# Supplementary material for: Clinical Significance of Prothrombin Time in Cholangiocarcinoma Patients with Surgeries
Source: Hindawi journal article supplement (doi:10.1155/2019/3413969), 2019-07-01
Supplement: f1 [file 3413969.f1.txt]

. import excel "C:\Users\whs\Desktop\ͳ�Ʊ�201904.xlsx", sheet("��������") firstrow

. set more off

. summ age plt pdw mpv neu lym plr nlr alb crp ca199 ca125 cea aptt pt dd fib tt inr,d

                             age
-------------------------------------------------------------
      Percentiles      Smallest
 1%           35             35
 5%           44             37
10%           48             42       Obs                  86
25%           53             42       Sum of Wgt.          86

50%           64                      Mean           62.32558
                        Largest       Std. Dev.      11.17502
75%           69             79
90%           76             80       Variance        124.881
95%           78             84       Skewness      -.1039855
99%           96             96       Kurtosis       3.088858

                             plt
-------------------------------------------------------------
      Percentiles      Smallest
 1%         48.6           48.6
 5%        108.5             66
10%       128.87             67       Obs                  86
25%       156.33            105       Sum of Wgt.          86

50%        200.5                      Mean           208.8142
                        Largest       Std. Dev.      72.77032
75%       258.67            343
90%          316            357       Variance       5295.519
95%          343            367       Skewness       .3974887
99%          414            414       Kurtosis       2.901454

                             pdw
-------------------------------------------------------------
      Percentiles      Smallest
 1%         10.6           10.6
 5%        11.04           10.8
10%         11.4          10.88       Obs                  86
25%         12.6           10.9       Sum of Wgt.          86

50%         14.9                      Mean           17.17012
                        Largest       Std. Dev.      8.580208
75%        17.99           44.3
90%        23.13           47.2       Variance       73.61998
95%         40.9           53.3       Skewness       2.892199
99%         53.3           53.3       Kurtosis       11.34348

                             mpv
-------------------------------------------------------------
      Percentiles      Smallest
 1%          6.6            6.6
 5%          9.9           8.96
10%           10            9.7       Obs                  86
25%         10.7            9.8       Sum of Wgt.          86

50%        11.55                      Mean           11.70163
                        Largest       Std. Dev.       1.71194
75%        12.46          13.75
90%        13.35           15.1       Variance       2.930738
95%        13.65           19.1       Skewness        1.59743
99%         19.1           19.1       Kurtosis       9.804721

                             neu
-------------------------------------------------------------
      Percentiles      Smallest
 1%          1.1            1.1
 5%         2.72              2
10%          2.9           2.48       Obs                  86
25%         3.53           2.55       Sum of Wgt.          86

50%        4.895                      Mean           5.629535
                        Largest       Std. Dev.       2.68252
75%         7.12          10.89
90%        10.13          11.48       Variance       7.195913
95%        10.82          12.38       Skewness       .9668348
99%        14.04          14.04       Kurtosis       3.330703

                             lym
-------------------------------------------------------------
      Percentiles      Smallest
 1%          .28            .28
 5%          .63            .48
10%           .7            .57       Obs                  86
25%           .9            .58       Sum of Wgt.          86

50%        1.115                      Mean           1.242791
                        Largest       Std. Dev.       .495202
75%          1.5           2.25
90%         2.01            2.3       Variance       .2452251
95%         2.11            2.5       Skewness       .9888426
99%         3.01           3.01       Kurtosis       4.059012

                             plr
-------------------------------------------------------------
      Percentiles      Smallest
 1%     58.92857       58.92857
 5%     80.44444       72.75748
10%     91.19497       74.44444       Obs                  86
25%          115       78.60697       Sum of Wgt.          86

50%      177.748                      Mean           189.6128
                        Largest       Std. Dev.      106.1446
75%       233.75       352.8846
90%     279.5263       384.2184       Variance       11266.67
95%     345.8824       396.6667       Skewness       3.427629
99%     883.9286       883.9286       Kurtosis       22.49579

                             nlr
-------------------------------------------------------------
      Percentiles      Smallest
 1%            1              1
 5%     1.657778       1.380952
10%     2.222222       1.577114       Obs                  86
25%     2.955975       1.636364       Sum of Wgt.          86

50%        4.024                      Mean           5.360464
                        Largest       Std. Dev.      3.840875
75%     6.166667       14.71429
90%     11.06818       17.46552       Variance       14.75232
95%       13.225          17.55       Skewness       1.795787
99%     19.65079       19.65079       Kurtosis       6.010558

                             alb
-------------------------------------------------------------
      Percentiles      Smallest
 1%           20             20
 5%        26.15          23.96
10%        28.57          24.97       Obs                  86
25%        31.33             25       Sum of Wgt.          86

50%        36.44                      Mean           36.17105
                        Largest       Std. Dev.      6.152935
75%        40.55           46.3
90%         43.9           47.9       Variance       37.85861
95%         45.4           48.3       Skewness       .1260121
99%           56             56       Kurtosis        3.42847

                             crp
-------------------------------------------------------------
      Percentiles      Smallest
 1%            1              1
 5%            1              1
10%          3.5              1       Obs                  79
25%            6              1       Sum of Wgt.          79

50%           17                      Mean           38.00797
                        Largest       Std. Dev.      47.18427
75%         54.3            142
90%          115            160       Variance       2226.356
95%          142            160       Skewness       1.922912
99%          240            240       Kurtosis       6.791655

                            ca199
-------------------------------------------------------------
      Percentiles      Smallest
 1%           .6             .6
 5%           .6             .6
10%         2.67             .6       Obs                  77
25%        23.39             .6       Sum of Wgt.          77

50%        90.52                      Mean           1108.094
                        Largest       Std. Dev.      6780.714
75%        312.5           1802
90%         1000           2004       Variance       4.60e+07
95%         1802           4376       Skewness       8.489131
99%        59575          59575       Kurtosis        73.6901

                            ca125
-------------------------------------------------------------
      Percentiles      Smallest
 1%          3.5            3.5
 5%         8.27           4.47
10%         9.18            7.4       Obs                  86
25%        12.02           7.57       Sum of Wgt.          86

50%       19.695                      Mean           36.50337
                        Largest       Std. Dev.      47.98831
75%        36.49          185.8
90%        80.26          228.3       Variance       2302.878
95%        113.4          245.7       Skewness       3.155821
99%        246.1          246.1       Kurtosis       13.01852

                             cea
-------------------------------------------------------------
      Percentiles      Smallest
 1%           .2             .2
 5%           .7            .22
10%          .99            .36       Obs                  77
25%         2.16             .7       Sum of Wgt.          77

50%         3.32                      Mean           4.965065
                        Largest       Std. Dev.      6.783899
75%          5.1           14.7
90%         7.91           20.5       Variance       46.02129
95%         14.7          37.45       Skewness       4.310647
99%        44.83          44.83       Kurtosis       23.38045

                            aptt
-------------------------------------------------------------
      Percentiles      Smallest
 1%           19             19
 5%         20.6             19
10%           22           19.4       Obs                  86
25%         24.6           19.6       Sum of Wgt.          86

50%        27.35                      Mean           28.49651
                        Largest       Std. Dev.      6.314436
75%         30.8           41.2
90%         35.6           43.1       Variance       39.87211
95%         41.2           44.4       Skewness        1.80639
99%         59.8           59.8       Kurtosis       9.005673

                             pt
-------------------------------------------------------------
      Percentiles      Smallest
 1%          9.3            9.3
 5%          9.7            9.3
10%          9.9            9.5       Obs                  86
25%         10.5            9.5       Sum of Wgt.          86

50%        11.25                      Mean           11.52558
                        Largest       Std. Dev.      1.484761
75%         12.3           14.3
90%         13.4           14.8       Variance       2.204514
95%         14.1           15.4       Skewness       1.306424
99%         17.9           17.9       Kurtosis       5.885854

                             dd
-------------------------------------------------------------
      Percentiles      Smallest
 1%          .08            .08
 5%          .12            .08
10%          .15             .1       Obs                  86
25%          .28            .11       Sum of Wgt.          86

50%          .59                      Mean           1.143093
                        Largest       Std. Dev.      1.788664
75%         1.14            4.6
90%         2.45           5.53       Variance        3.19932
95%          4.3           7.34       Skewness       4.226945
99%        12.96          12.96       Kurtosis       25.19305

                             fib
-------------------------------------------------------------
      Percentiles      Smallest
 1%          1.2            1.2
 5%         2.29            1.9
10%          2.8            1.9       Obs                  86
25%          3.2            2.1       Sum of Wgt.          86

50%         3.65                      Mean           3.937558
                        Largest       Std. Dev.      1.318113
75%         4.48            6.8
90%          5.9            7.9       Variance       1.737421
95%          6.8            7.9       Skewness       1.185435
99%          7.9            7.9       Kurtosis       4.602625

                             tt
-------------------------------------------------------------
      Percentiles      Smallest
 1%         15.2           15.2
 5%         16.2           15.5
10%         16.4           15.9       Obs                  86
25%         17.2             16       Sum of Wgt.          86

50%           18                      Mean           18.35279
                        Largest       Std. Dev.      2.422302
75%         18.7           22.5
90%         20.1           22.8       Variance       5.867547
95%         22.1             27       Skewness       3.847253
99%         34.1           34.1       Kurtosis       23.66926

                             inr
-------------------------------------------------------------
      Percentiles      Smallest
 1%           .8             .8
 5%          .83             .8
10%          .86             .8       Obs                  86
25%          .92            .83       Sum of Wgt.          86

50%         .975                      Mean            .995814
                        Largest       Std. Dev.      .1244892
75%         1.07           1.23
90%         1.15           1.27       Variance       .0154976
95%         1.22           1.32       Skewness       1.231086
99%         1.52           1.52       Kurtosis       5.641695

. summ time1 time2,d

                            time1
-------------------------------------------------------------
      Percentiles      Smallest
 1%          2.8            2.8
 5%          3.5              3
10%            5              3       Obs                  86
25%          7.2            3.4       Sum of Wgt.          86

50%         15.5                      Mean           20.81628
                        Largest       Std. Dev.       18.9743
75%         27.7           78.3
90%           42           80.2       Variance        360.024
95%           50             90       Skewness       2.029675
99%         95.8           95.8       Kurtosis       7.589367

                            time2
-------------------------------------------------------------
      Percentiles      Smallest
 1%            1              1
 5%          1.1              1
10%            2              1       Obs                  86
25%            4            1.1       Sum of Wgt.          86

50%          7.1                      Mean           15.35349
                        Largest       Std. Dev.      19.13957
75%           20             75
90%           34           78.3       Variance       366.3232
95%           50             90       Skewness       2.431433
99%         95.8           95.8       Kurtosis       9.330155

. tab gender 

     gender |      Freq.     Percent        Cum.
------------+-----------------------------------
          1 |         48       55.81       55.81
          2 |         38       44.19      100.00
------------+-----------------------------------
      Total |         86      100.00

. 
. tab cite 

       cite |      Freq.     Percent        Cum.
------------+-----------------------------------
          1 |         23       26.74       26.74
          2 |         35       40.70       67.44
          3 |         28       32.56      100.00
------------+-----------------------------------
      Total |         86      100.00

. 
. tab GPS 

        GPS |      Freq.     Percent        Cum.
------------+-----------------------------------
          0 |         19       22.09       22.09
          1 |         31       36.05       58.14
          2 |         36       41.86      100.00
------------+-----------------------------------
      Total |         86      100.00

. 
. tab lymm 

       lymm |      Freq.     Percent        Cum.
------------+-----------------------------------
          1 |         39       45.35       45.35
          2 |         47       54.65      100.00
------------+-----------------------------------
      Total |         86      100.00

. 
. tab nerv 

      nerv  |      Freq.     Percent        Cum.
------------+-----------------------------------
          1 |         60       69.77       69.77
          2 |         26       30.23      100.00
------------+-----------------------------------
      Total |         86      100.00

. 
. tab diff 

       diff |      Freq.     Percent        Cum.
------------+-----------------------------------
          1 |         57       66.28       66.28
          2 |         29       33.72      100.00
------------+-----------------------------------
      Total |         86      100.00

. 
. tab stage 

      stage |      Freq.     Percent        Cum.
------------+-----------------------------------
          1 |         62       72.09       72.09
          2 |         24       27.91      100.00
------------+-----------------------------------
      Total |         86      100.00

. 
. tab re 

         re |      Freq.     Percent        Cum.
------------+-----------------------------------
          1 |         65       75.58       75.58
          2 |         21       24.42      100.00
------------+-----------------------------------
      Total |         86      100.00

. 
. tab die

        die |      Freq.     Percent        Cum.
------------+-----------------------------------
          1 |         57       66.28       66.28
          2 |         29       33.72      100.00
------------+-----------------------------------
      Total |         86      100.00

. gen gage=0

. 
. replace gage=1 if age<64
(40 real changes made)

. 
. replace gage=2 if age>=64
(46 real changes made)

. 
. 
. 
. gen gplt=0

. 
. replace gplt=1 if plt<258.67
(64 real changes made)

. 
. replace gplt=2 if plt>=258.67
(22 real changes made)

. 
. 
. 
. gen gplr=0

. 
. replace gplr=1 if plr<240.18
(66 real changes made)

. 
. replace gplr=2 if plr>=240.18
(20 real changes made)

. 
. 
. 
. gen gnlr=0

. 
. replace gnlr=1 if nlr<6.17
(65 real changes made)

. 
. replace gnlr=2 if nlr>=6.17
(21 real changes made)

. 
. 
. 
. 
. 
. gen gca199=0

. 
. replace gca199=1 if ca199<312.5
(57 real changes made)

. 
. replace gca199=2 if ca199>=312.5
(29 real changes made)

. 
. 
. 
. gen gca125=0

. 
. replace gca125=1 if ca125<36.49 
(59 real changes made)

. 
. replace gca125=2 if ca125>=36.49 
(27 real changes made)

. 
. gen gcea=0

. 
. replace gcea=1 if cea<5.1
(57 real changes made)

. 
. replace gcea=2 if cea>=5.1
(29 real changes made)

. 
. 
. 
. gen gaptt=0

. 
. replace gaptt=1 if aptt<30.8
(64 real changes made)

. 
. replace gaptt=2 if aptt>=30.8
(22 real changes made)

. 
. 
. 
. gen gdd=0

. 
. replace gdd=1 if dd<1.14
(62 real changes made)

. 
. replace gdd=2 if dd>=1.14
(24 real changes made)

. 
. 
. 
. gen gfib=0

. 
. replace gfib=1 if fib<4.48
(64 real changes made)

. 
. replace gfib=2 if fib>=4.48
(22 real changes made)

. 
. 
. 
. gen ginr=0

. 
. replace ginr=1 if inr<1.07
(64 real changes made)

. 
. replace ginr=2 if inr>=1.07
(22 real changes made)

. 
. 
. 
. 
. 
. 
. 
. gen gpt=0

. 
. replace gpt=1 if pt<12.3
(64 real changes made)

. 
. replace gpt=2 if pt>=12.3
(22 real changes made)

. 
. 
. 
. gen gtt=0

. 
. replace gtt=1 if tt<18.7
(61 real changes made)

. 
. replace gtt=2 if tt>=18.7
(25 real changes made)

. 
. 
. 
. 
. 
. gen gpdw=0

. 
. replace gpdw=1 if pdw<17.99 
(64 real changes made)

. 
. replace gpdw=2 if pdw>=17.99
(22 real changes made)

. 
. 
. 
. gen gmpv=0

. 
. replace gmpv=1 if mpv<12.46
(64 real changes made)

. 
. replace gmpv=2 if mpv>=12.46
(22 real changes made)

. 
. 
. 
. gen gneu=0

. 
. replace gneu=1 if neu<7.12
(64 real changes made)

. 
. replace gneu=2 if neu>=7.12
(22 real changes made)

. 
. 
. 
. gen glym=0

. 
. replace glym=1 if lym<1.5
(64 real changes made)

. 
. replace glym=2 if lym>=1.5
(22 real changes made)

. 
. 
. 
. gen galb=0

. 
. replace galb=1 if alb<35
(38 real changes made)

. 
. replace galb=2 if alb>=35
(48 real changes made)

. 
. 
. 
. gen gcrp=0

. 
. replace gcrp=1 if crp<10
(25 real changes made)

. 
. replace gcrp=2 if crp>=10
(61 real changes made)

. replace GPS=1 if GPS ==2
(36 real changes made)

. cox time1 diff, dead(die) hr

Iteration 0:   log likelihood = -301.02275
Iteration 1:   log likelihood = -291.68055
Iteration 2:   log likelihood = -290.83034
Iteration 3:   log likelihood = -290.83033
Refining estimates:
Iteration 0:   log likelihood = -290.83033

Cox regression -- Breslow method for ties
Entry time 0                                      Number of obs   =         86
                                                  LR chi2(1)      =      20.38
                                                  Prob > chi2     =     0.0000
Log likelihood = -290.83033                       Pseudo R2       =     0.0339

------------------------------------------------------------------------------
       time1 | Haz. Ratio   Std. Err.      z    P>|z|     [95% Conf. Interval]
-------------+----------------------------------------------------------------
        diff |   3.382417   .8787494     4.69   0.000     2.032758    5.628189
------------------------------------------------------------------------------

. 
. cox time1 stage, dead(die) hr

Iteration 0:   log likelihood = -301.02275
Iteration 1:   log likelihood = -298.37439
Iteration 2:   log likelihood = -298.29048
Iteration 3:   log likelihood = -298.29046
Refining estimates:
Iteration 0:   log likelihood = -298.29046

Cox regression -- Breslow method for ties
Entry time 0                                      Number of obs   =         86
                                                  LR chi2(1)      =       5.46
                                                  Prob > chi2     =     0.0194
Log likelihood = -298.29046                       Pseudo R2       =     0.0091

------------------------------------------------------------------------------
       time1 | Haz. Ratio   Std. Err.      z    P>|z|     [95% Conf. Interval]
-------------+----------------------------------------------------------------
       stage |   1.840317   .4612531     2.43   0.015     1.126028     3.00771
------------------------------------------------------------------------------

. 
. cox time1 lymm, dead(die) hr

Iteration 0:   log likelihood = -301.02275
Iteration 1:   log likelihood = -299.87801
Iteration 2:   log likelihood = -299.87679
Refining estimates:
Iteration 0:   log likelihood = -299.87679

Cox regression -- Breslow method for ties
Entry time 0                                      Number of obs   =         86
                                                  LR chi2(1)      =       2.29
                                                  Prob > chi2     =     0.1300
Log likelihood = -299.87679                       Pseudo R2       =     0.0038

------------------------------------------------------------------------------
       time1 | Haz. Ratio   Std. Err.      z    P>|z|     [95% Conf. Interval]
-------------+----------------------------------------------------------------
        lymm |   .7115237   .1588311    -1.52   0.127     .4593868    1.102047
------------------------------------------------------------------------------

. 
. cox time1 nerv, dead(die) hr

Iteration 0:   log likelihood = -301.02275
Iteration 1:   log likelihood = -300.31089
Iteration 2:   log likelihood = -300.30977
Refining estimates:
Iteration 0:   log likelihood = -300.30977

Cox regression -- Breslow method for ties
Entry time 0                                      Number of obs   =         86
                                                  LR chi2(1)      =       1.43
                                                  Prob > chi2     =     0.2324
Log likelihood = -300.30977                       Pseudo R2       =     0.0024

------------------------------------------------------------------------------
       time1 | Haz. Ratio   Std. Err.      z    P>|z|     [95% Conf. Interval]
-------------+----------------------------------------------------------------
        nerv |   .7563662   .1797557    -1.17   0.240     .4747207    1.205108
------------------------------------------------------------------------------

. 
. cox time1 gplt, dead(die) hr

Iteration 0:   log likelihood = -301.02275
Iteration 1:   log likelihood = -299.49684
Iteration 2:   log likelihood = -299.48813
Iteration 3:   log likelihood = -299.48813
Refining estimates:
Iteration 0:   log likelihood = -299.48813

Cox regression -- Breslow method for ties
Entry time 0                                      Number of obs   =         86
                                                  LR chi2(1)      =       3.07
                                                  Prob > chi2     =     0.0798
Log likelihood = -299.48813                       Pseudo R2       =     0.0051

------------------------------------------------------------------------------
       time1 | Haz. Ratio   Std. Err.      z    P>|z|     [95% Conf. Interval]
-------------+----------------------------------------------------------------
        gplt |   .6515567   .1646613    -1.70   0.090     .3970423    1.069222
------------------------------------------------------------------------------

. 
. cox time1 gpdw, dead(die) hr

Iteration 0:   log likelihood = -301.02275
Iteration 1:   log likelihood = -300.96052
Iteration 2:   log likelihood =  -300.9605
Refining estimates:
Iteration 0:   log likelihood =  -300.9605

Cox regression -- Breslow method for ties
Entry time 0                                      Number of obs   =         86
                                                  LR chi2(1)      =       0.12
                                                  Prob > chi2     =     0.7242
Log likelihood =  -300.9605                       Pseudo R2       =     0.0002

------------------------------------------------------------------------------
       time1 | Haz. Ratio   Std. Err.      z    P>|z|     [95% Conf. Interval]
-------------+----------------------------------------------------------------
        gpdw |   .9158288   .2297615    -0.35   0.726     .5601011    1.497484
------------------------------------------------------------------------------

. 
. cox time1 gmpv, dead(die) hr

Iteration 0:   log likelihood = -301.02275
Iteration 1:   log likelihood = -300.66434
Iteration 2:   log likelihood = -300.66306
Iteration 3:   log likelihood = -300.66306
Refining estimates:
Iteration 0:   log likelihood = -300.66306

Cox regression -- Breslow method for ties
Entry time 0                                      Number of obs   =         86
                                                  LR chi2(1)      =       0.72
                                                  Prob > chi2     =     0.3963
Log likelihood = -300.66306                       Pseudo R2       =     0.0012

------------------------------------------------------------------------------
       time1 | Haz. Ratio   Std. Err.      z    P>|z|     [95% Conf. Interval]
-------------+----------------------------------------------------------------
        gmpv |   1.239976   .3089981     0.86   0.388     .7608452    2.020831
------------------------------------------------------------------------------

. 
. cox time1 glym, dead(die) hr

Iteration 0:   log likelihood = -301.02275
Iteration 1:   log likelihood =  -299.3415
Iteration 2:   log likelihood = -299.33391
Iteration 3:   log likelihood = -299.33391
Refining estimates:
Iteration 0:   log likelihood = -299.33391

Cox regression -- Breslow method for ties
Entry time 0                                      Number of obs   =         86
                                                  LR chi2(1)      =       3.38
                                                  Prob > chi2     =     0.0661
Log likelihood = -299.33391                       Pseudo R2       =     0.0056

------------------------------------------------------------------------------
       time1 | Haz. Ratio   Std. Err.      z    P>|z|     [95% Conf. Interval]
-------------+----------------------------------------------------------------
        glym |   .6362834   .1613015    -1.78   0.075     .3871383    1.045767
------------------------------------------------------------------------------

. 
. cox time1 gneu, dead(die) hr

Iteration 0:   log likelihood = -301.02275
Iteration 1:   log likelihood = -300.85076
Iteration 2:   log likelihood = -300.85051
Refining estimates:
Iteration 0:   log likelihood = -300.85051

Cox regression -- Breslow method for ties
Entry time 0                                      Number of obs   =         86
                                                  LR chi2(1)      =       0.34
                                                  Prob > chi2     =     0.5573
Log likelihood = -300.85051                       Pseudo R2       =     0.0006

------------------------------------------------------------------------------
       time1 | Haz. Ratio   Std. Err.      z    P>|z|     [95% Conf. Interval]
-------------+----------------------------------------------------------------
        gneu |   1.159659   .2892559     0.59   0.553     .7112356    1.890807
------------------------------------------------------------------------------

. 
. cox time1 gplr, dead(die) hr

Iteration 0:   log likelihood = -301.02275
Iteration 1:   log likelihood = -300.99474
Iteration 2:   log likelihood = -300.99473
Refining estimates:
Iteration 0:   log likelihood = -300.99473

Cox regression -- Breslow method for ties
Entry time 0                                      Number of obs   =         86
                                                  LR chi2(1)      =       0.06
                                                  Prob > chi2     =     0.8129
Log likelihood = -300.99473                       Pseudo R2       =     0.0001

------------------------------------------------------------------------------
       time1 | Haz. Ratio   Std. Err.      z    P>|z|     [95% Conf. Interval]
-------------+----------------------------------------------------------------
        gplr |   .9397185   .2482137    -0.24   0.814     .5599698    1.576997
------------------------------------------------------------------------------

. 
. cox time1 gnlr, dead(die) hr

Iteration 0:   log likelihood = -301.02275
Iteration 1:   log likelihood = -298.67779
Iteration 2:   log likelihood = -298.57276
Iteration 3:   log likelihood =  -298.5727
Refining estimates:
Iteration 0:   log likelihood =  -298.5727

Cox regression -- Breslow method for ties
Entry time 0                                      Number of obs   =         86
                                                  LR chi2(1)      =       4.90
                                                  Prob > chi2     =     0.0269
Log likelihood =  -298.5727                       Pseudo R2       =     0.0081

------------------------------------------------------------------------------
       time1 | Haz. Ratio   Std. Err.      z    P>|z|     [95% Conf. Interval]
-------------+----------------------------------------------------------------
        gnlr |   1.820488   .4693372     2.32   0.020     1.098351    3.017413
------------------------------------------------------------------------------

. 
. cox time1 galb, dead(die) hr

Iteration 0:   log likelihood = -301.02275
Iteration 1:   log likelihood = -298.77783
Iteration 2:   log likelihood = -298.77172
Refining estimates:
Iteration 0:   log likelihood = -298.77172

Cox regression -- Breslow method for ties
Entry time 0                                      Number of obs   =         86
                                                  LR chi2(1)      =       4.50
                                                  Prob > chi2     =     0.0339
Log likelihood = -298.77172                       Pseudo R2       =     0.0075

------------------------------------------------------------------------------
       time1 | Haz. Ratio   Std. Err.      z    P>|z|     [95% Conf. Interval]
-------------+----------------------------------------------------------------
        galb |   .6175219   .1389795    -2.14   0.032     .3972655    .9598953
------------------------------------------------------------------------------

. 
. cox time1 gcrp, dead(die) hr

Iteration 0:   log likelihood = -301.02275
Iteration 1:   log likelihood = -300.40106
Iteration 2:   log likelihood = -300.40012
Refining estimates:
Iteration 0:   log likelihood = -300.40012

Cox regression -- Breslow method for ties
Entry time 0                                      Number of obs   =         86
                                                  LR chi2(1)      =       1.25
                                                  Prob > chi2     =     0.2645
Log likelihood = -300.40012                       Pseudo R2       =     0.0021

------------------------------------------------------------------------------
       time1 | Haz. Ratio   Std. Err.      z    P>|z|     [95% Conf. Interval]
-------------+----------------------------------------------------------------
        gcrp |   1.303561   .3145816     1.10   0.272      .812298    2.091931
------------------------------------------------------------------------------

. 
. cox time1 GPS, dead(die) hr

Iteration 0:   log likelihood = -301.02275
Iteration 1:   log likelihood = -300.78205
Iteration 2:   log likelihood = -300.78166
Refining estimates:
Iteration 0:   log likelihood = -300.78166

Cox regression -- Breslow method for ties
Entry time 0                                      Number of obs   =         86
                                                  LR chi2(1)      =       0.48
                                                  Prob > chi2     =     0.4874
Log likelihood = -300.78166                       Pseudo R2       =     0.0008

------------------------------------------------------------------------------
       time1 | Haz. Ratio   Std. Err.      z    P>|z|     [95% Conf. Interval]
-------------+----------------------------------------------------------------
         GPS |   1.198116   .3166109     0.68   0.494     .7137774    2.011107
------------------------------------------------------------------------------

. 
. cox time1 gpt, dead(die) hr

Iteration 0:   log likelihood = -301.02275
Iteration 1:   log likelihood =  -299.1596
Iteration 2:   log likelihood = -299.10587
Iteration 3:   log likelihood = -299.10586
Refining estimates:
Iteration 0:   log likelihood = -299.10586

Cox regression -- Breslow method for ties
Entry time 0                                      Number of obs   =         86
                                                  LR chi2(1)      =       3.83
                                                  Prob > chi2     =     0.0502
Log likelihood = -299.10586                       Pseudo R2       =     0.0064

------------------------------------------------------------------------------
       time1 | Haz. Ratio   Std. Err.      z    P>|z|     [95% Conf. Interval]
-------------+----------------------------------------------------------------
         gpt |   1.669973   .4198036     2.04   0.041     1.020308    2.733301
------------------------------------------------------------------------------

. 
. cox time1 gaptt, dead(die) hr

Iteration 0:   log likelihood = -301.02275
Iteration 1:   log likelihood = -300.86381
Iteration 2:   log likelihood = -300.86366
Refining estimates:
Iteration 0:   log likelihood = -300.86366

Cox regression -- Breslow method for ties
Entry time 0                                      Number of obs   =         86
                                                  LR chi2(1)      =       0.32
                                                  Prob > chi2     =     0.5727
Log likelihood = -300.86366                       Pseudo R2       =     0.0005

------------------------------------------------------------------------------
       time1 | Haz. Ratio   Std. Err.      z    P>|z|     [95% Conf. Interval]
-------------+----------------------------------------------------------------
       gaptt |   .8683611   .2197825    -0.56   0.577     .5287629    1.426066
------------------------------------------------------------------------------

. 
. cox time1 gfib, dead(die) hr

Iteration 0:   log likelihood = -301.02275
Iteration 1:   log likelihood = -300.23093
Iteration 2:   log likelihood = -300.22509
Iteration 3:   log likelihood = -300.22509
Refining estimates:
Iteration 0:   log likelihood = -300.22509

Cox regression -- Breslow method for ties
Entry time 0                                      Number of obs   =         86
                                                  LR chi2(1)      =       1.60
                                                  Prob > chi2     =     0.2066
Log likelihood = -300.22509                       Pseudo R2       =     0.0026

------------------------------------------------------------------------------
       time1 | Haz. Ratio   Std. Err.      z    P>|z|     [95% Conf. Interval]
-------------+----------------------------------------------------------------
        gfib |   1.393464   .3576245     1.29   0.196     .8426358    2.304368
------------------------------------------------------------------------------

. 
. cox time1 gtt, dead(die) hr

Iteration 0:   log likelihood = -301.02275
Iteration 1:   log likelihood =   -301.022
Iteration 2:   log likelihood =   -301.022
Refining estimates:
Iteration 0:   log likelihood =   -301.022

Cox regression -- Breslow method for ties
Entry time 0                                      Number of obs   =         86
                                                  LR chi2(1)      =       0.00
                                                  Prob > chi2     =     0.9692
Log likelihood =   -301.022                       Pseudo R2       =     0.0000

------------------------------------------------------------------------------
       time1 | Haz. Ratio   Std. Err.      z    P>|z|     [95% Conf. Interval]
-------------+----------------------------------------------------------------
         gtt |   .9908071   .2368299    -0.04   0.969     .6201956    1.582885
------------------------------------------------------------------------------

. 
. cox time1 gdd, dead(die) hr

Iteration 0:   log likelihood = -301.02275
Iteration 1:   log likelihood = -300.58783
Iteration 2:   log likelihood = -300.58609
Iteration 3:   log likelihood = -300.58609
Refining estimates:
Iteration 0:   log likelihood = -300.58609

Cox regression -- Breslow method for ties
Entry time 0                                      Number of obs   =         86
                                                  LR chi2(1)      =       0.87
                                                  Prob > chi2     =     0.3500
Log likelihood = -300.58609                       Pseudo R2       =     0.0015

------------------------------------------------------------------------------
       time1 | Haz. Ratio   Std. Err.      z    P>|z|     [95% Conf. Interval]
-------------+----------------------------------------------------------------
         gdd |   1.263114   .3099942     0.95   0.341     .7808009    2.043361
------------------------------------------------------------------------------

. 
. cox time1 gca125, dead(die) hr

Iteration 0:   log likelihood = -301.02275
Iteration 1:   log likelihood = -301.01419
Iteration 2:   log likelihood = -301.01419
Refining estimates:
Iteration 0:   log likelihood = -301.01419

Cox regression -- Breslow method for ties
Entry time 0                                      Number of obs   =         86
                                                  LR chi2(1)      =       0.02
                                                  Prob > chi2     =     0.8959
Log likelihood = -301.01419                       Pseudo R2       =     0.0000

------------------------------------------------------------------------------
       time1 | Haz. Ratio   Std. Err.      z    P>|z|     [95% Conf. Interval]
-------------+----------------------------------------------------------------
      gca125 |   .9697684   .2279352    -0.13   0.896     .6117879    1.537217
------------------------------------------------------------------------------

. 
. cox time1 gca199, dead(die) hr

Iteration 0:   log likelihood = -301.02275
Iteration 1:   log likelihood = -300.21219
Iteration 2:   log likelihood =   -300.209
Iteration 3:   log likelihood =   -300.209
Refining estimates:
Iteration 0:   log likelihood =   -300.209

Cox regression -- Breslow method for ties
Entry time 0                                      Number of obs   =         86
                                                  LR chi2(1)      =       1.63
                                                  Prob > chi2     =     0.2021
Log likelihood =   -300.209                       Pseudo R2       =     0.0027

------------------------------------------------------------------------------
       time1 | Haz. Ratio   Std. Err.      z    P>|z|     [95% Conf. Interval]
-------------+----------------------------------------------------------------
      gca199 |   1.347558   .3097851     1.30   0.194     .8587527    2.114594
------------------------------------------------------------------------------

. 
. cox time1 gcea, dead(die) hr

Iteration 0:   log likelihood = -301.02275
Iteration 1:   log likelihood = -300.59652
Iteration 2:   log likelihood = -300.59588
Refining estimates:
Iteration 0:   log likelihood = -300.59588

Cox regression -- Breslow method for ties
Entry time 0                                      Number of obs   =         86
                                                  LR chi2(1)      =       0.85
                                                  Prob > chi2     =     0.3555
Log likelihood = -300.59588                       Pseudo R2       =     0.0014

------------------------------------------------------------------------------
       time1 | Haz. Ratio   Std. Err.      z    P>|z|     [95% Conf. Interval]
-------------+----------------------------------------------------------------
        gcea |   1.242951   .2893908     0.93   0.350     .7875402    1.961714
------------------------------------------------------------------------------

. 
. cox time1 gage, dead(die) hr

Iteration 0:   log likelihood = -301.02275
Iteration 1:   log likelihood = -298.13919
Iteration 2:   log likelihood = -298.13842
Refining estimates:
Iteration 0:   log likelihood = -298.13842

Cox regression -- Breslow method for ties
Entry time 0                                      Number of obs   =         86
                                                  LR chi2(1)      =       5.77
                                                  Prob > chi2     =     0.0163
Log likelihood = -298.13842                       Pseudo R2       =     0.0096

------------------------------------------------------------------------------
       time1 | Haz. Ratio   Std. Err.      z    P>|z|     [95% Conf. Interval]
-------------+----------------------------------------------------------------
        gage |   1.709412   .3828867     2.39   0.017     1.102017    2.651582
------------------------------------------------------------------------------

. cox time1 gage gpt galb gnlr stage diff, dead(die) hr

Iteration 0:   log likelihood = -301.02275
Iteration 1:   log likelihood = -286.34228
Iteration 2:   log likelihood = -284.34101
Iteration 3:   log likelihood = -284.33678
Refining estimates:
Iteration 0:   log likelihood = -284.33678

Cox regression -- Breslow method for ties
Entry time 0                                      Number of obs   =         86
                                                  LR chi2(6)      =      33.37
                                                  Prob > chi2     =     0.0000
Log likelihood = -284.33678                       Pseudo R2       =     0.0554

------------------------------------------------------------------------------
       time1 | Haz. Ratio   Std. Err.      z    P>|z|     [95% Conf. Interval]
-------------+----------------------------------------------------------------
        gage |   1.477811   .3476973     1.66   0.097      .931857    2.343626
         gpt |    1.82906   .5254293     2.10   0.036     1.041611    3.211814
        galb |   1.237553   .3563878     0.74   0.459     .7037796    2.176161
        gnlr |   1.456638   .4065193     1.35   0.178     .8429419    2.517128
       stage |   1.621433   .4204542     1.86   0.062     .9753795    2.695407
        diff |   3.045922   .9367789     3.62   0.000     1.666979    5.565541
------------------------------------------------------------------------------

. cox time2 diff, dead(re) hr

Iteration 0:   log likelihood = -301.56621
Iteration 1:   log likelihood = -292.27624
Iteration 2:   log likelihood = -291.55215
Iteration 3:   log likelihood = -291.55214
Refining estimates:
Iteration 0:   log likelihood = -291.55214

Cox regression -- Breslow method for ties
Entry time 0                                      Number of obs   =         86
                                                  LR chi2(1)      =      20.03
                                                  Prob > chi2     =     0.0000
Log likelihood = -291.55214                       Pseudo R2       =     0.0332

------------------------------------------------------------------------------
       time2 | Haz. Ratio   Std. Err.      z    P>|z|     [95% Conf. Interval]
-------------+----------------------------------------------------------------
        diff |   3.384228   .8904024     4.63   0.000     2.020717     5.66779
------------------------------------------------------------------------------

. 
. cox time2 stage, dead(re) hr

Iteration 0:   log likelihood = -301.56621
Iteration 1:   log likelihood = -297.71761
Iteration 2:   log likelihood = -297.54689
Iteration 3:   log likelihood = -297.54685
Refining estimates:
Iteration 0:   log likelihood = -297.54685

Cox regression -- Breslow method for ties
Entry time 0                                      Number of obs   =         86
                                                  LR chi2(1)      =       8.04
                                                  Prob > chi2     =     0.0046
Log likelihood = -297.54685                       Pseudo R2       =     0.0133

------------------------------------------------------------------------------
       time2 | Haz. Ratio   Std. Err.      z    P>|z|     [95% Conf. Interval]
-------------+----------------------------------------------------------------
       stage |    2.15378   .5593249     2.95   0.003      1.29464    3.583057
------------------------------------------------------------------------------

. 
. cox time2 lymm, dead(re) hr

Iteration 0:   log likelihood = -301.56621
Iteration 1:   log likelihood = -300.18696
Iteration 2:   log likelihood = -300.18482
Refining estimates:
Iteration 0:   log likelihood = -300.18482

Cox regression -- Breslow method for ties
Entry time 0                                      Number of obs   =         86
                                                  LR chi2(1)      =       2.76
                                                  Prob > chi2     =     0.0965
Log likelihood = -300.18482                       Pseudo R2       =     0.0046

------------------------------------------------------------------------------
       time2 | Haz. Ratio   Std. Err.      z    P>|z|     [95% Conf. Interval]
-------------+----------------------------------------------------------------
        lymm |   .6896704   .1528779    -1.68   0.094     .4466397    1.064942
------------------------------------------------------------------------------

. 
. cox time2 nerv, dead(re) hr

Iteration 0:   log likelihood = -301.56621
Iteration 1:   log likelihood = -300.33851
Iteration 2:   log likelihood =  -300.3358
Iteration 3:   log likelihood =  -300.3358
Refining estimates:
Iteration 0:   log likelihood =  -300.3358

Cox regression -- Breslow method for ties
Entry time 0                                      Number of obs   =         86
                                                  LR chi2(1)      =       2.46
                                                  Prob > chi2     =     0.1167
Log likelihood =  -300.3358                       Pseudo R2       =     0.0041

------------------------------------------------------------------------------
       time2 | Haz. Ratio   Std. Err.      z    P>|z|     [95% Conf. Interval]
-------------+----------------------------------------------------------------
        nerv |   .6923828   .1656201    -1.54   0.124     .4332477    1.106512
------------------------------------------------------------------------------

. 
. cox time2 gplt, dead(re) hr

Iteration 0:   log likelihood = -301.56621
Iteration 1:   log likelihood = -300.31408
Iteration 2:   log likelihood = -300.30777
Iteration 3:   log likelihood = -300.30777
Refining estimates:
Iteration 0:   log likelihood = -300.30777

Cox regression -- Breslow method for ties
Entry time 0                                      Number of obs   =         86
                                                  LR chi2(1)      =       2.52
                                                  Prob > chi2     =     0.1126
Log likelihood = -300.30777                       Pseudo R2       =     0.0042

------------------------------------------------------------------------------
       time2 | Haz. Ratio   Std. Err.      z    P>|z|     [95% Conf. Interval]
-------------+----------------------------------------------------------------
        gplt |   .6777288   .1712667    -1.54   0.124     .4130014    1.112142
------------------------------------------------------------------------------

. 
. cox time2 gpdw, dead(re) hr

Iteration 0:   log likelihood = -301.56621
Iteration 1:   log likelihood = -301.56607
Iteration 2:   log likelihood = -301.56607
Refining estimates:
Iteration 0:   log likelihood = -301.56607

Cox regression -- Breslow method for ties
Entry time 0                                      Number of obs   =         86
                                                  LR chi2(1)      =       0.00
                                                  Prob > chi2     =     0.9864
Log likelihood = -301.56607                       Pseudo R2       =     0.0000

------------------------------------------------------------------------------
       time2 | Haz. Ratio   Std. Err.      z    P>|z|     [95% Conf. Interval]
-------------+----------------------------------------------------------------
        gpdw |   .9957275   .2494694    -0.02   0.986     .6093693    1.627048
------------------------------------------------------------------------------

. 
. cox time2 gmpv, dead(re) hr

Iteration 0:   log likelihood = -301.56621
Iteration 1:   log likelihood = -301.49314
Iteration 2:   log likelihood = -301.49309
Refining estimates:
Iteration 0:   log likelihood = -301.49309

Cox regression -- Breslow method for ties
Entry time 0                                      Number of obs   =         86
                                                  LR chi2(1)      =       0.15
                                                  Prob > chi2     =     0.7022
Log likelihood = -301.49309                       Pseudo R2       =     0.0002

------------------------------------------------------------------------------
       time2 | Haz. Ratio   Std. Err.      z    P>|z|     [95% Conf. Interval]
-------------+----------------------------------------------------------------
        gmpv |   1.100794   .2743234     0.39   0.700     .6754331     1.79403
------------------------------------------------------------------------------

. 
. cox time2 glym, dead(re) hr

Iteration 0:   log likelihood = -301.56621
Iteration 1:   log likelihood = -300.44354
Iteration 2:   log likelihood = -300.43947
Iteration 3:   log likelihood = -300.43947
Refining estimates:
Iteration 0:   log likelihood = -300.43947

Cox regression -- Breslow method for ties
Entry time 0                                      Number of obs   =         86
                                                  LR chi2(1)      =       2.25
                                                  Prob > chi2     =     0.1333
Log likelihood = -300.43947                       Pseudo R2       =     0.0037

------------------------------------------------------------------------------
       time2 | Haz. Ratio   Std. Err.      z    P>|z|     [95% Conf. Interval]
-------------+----------------------------------------------------------------
        glym |   .6913692   .1743678    -1.46   0.143      .421727    1.133414
------------------------------------------------------------------------------

. 
. cox time2 gneu, dead(re) hr

Iteration 0:   log likelihood = -301.56621
Iteration 1:   log likelihood = -301.41803
Iteration 2:   log likelihood = -301.41784
Refining estimates:
Iteration 0:   log likelihood = -301.41784

Cox regression -- Breslow method for ties
Entry time 0                                      Number of obs   =         86
                                                  LR chi2(1)      =       0.30
                                                  Prob > chi2     =     0.5859
Log likelihood = -301.41784                       Pseudo R2       =     0.0005

------------------------------------------------------------------------------
       time2 | Haz. Ratio   Std. Err.      z    P>|z|     [95% Conf. Interval]
-------------+----------------------------------------------------------------
        gneu |   1.146888   .2853887     0.55   0.582     .7042228    1.867806
------------------------------------------------------------------------------

. 
. cox time2 gplr, dead(re) hr

Iteration 0:   log likelihood = -301.56621
Iteration 1:   log likelihood =  -301.5635
Iteration 2:   log likelihood =  -301.5635
Refining estimates:
Iteration 0:   log likelihood =  -301.5635

Cox regression -- Breslow method for ties
Entry time 0                                      Number of obs   =         86
                                                  LR chi2(1)      =       0.01
                                                  Prob > chi2     =     0.9413
Log likelihood =  -301.5635                       Pseudo R2       =     0.0000

------------------------------------------------------------------------------
       time2 | Haz. Ratio   Std. Err.      z    P>|z|     [95% Conf. Interval]
-------------+----------------------------------------------------------------
        gplr |   .9808611    .257788    -0.07   0.941     .5859984    1.641794
------------------------------------------------------------------------------

. 
. cox time2 gnlr, dead(re) hr

Iteration 0:   log likelihood = -301.56621
Iteration 1:   log likelihood = -300.07139
Iteration 2:   log likelihood = -300.03529
Iteration 3:   log likelihood = -300.03528
Refining estimates:
Iteration 0:   log likelihood = -300.03528

Cox regression -- Breslow method for ties
Entry time 0                                      Number of obs   =         86
                                                  LR chi2(1)      =       3.06
                                                  Prob > chi2     =     0.0801
Log likelihood = -300.03528                       Pseudo R2       =     0.0051

------------------------------------------------------------------------------
       time2 | Haz. Ratio   Std. Err.      z    P>|z|     [95% Conf. Interval]
-------------+----------------------------------------------------------------
        gnlr |   1.590461   .4056294     1.82   0.069     .9647916    2.621878
------------------------------------------------------------------------------

. 
. cox time2 galb, dead(re) hr

Iteration 0:   log likelihood = -301.56621
Iteration 1:   log likelihood = -298.43862
Iteration 2:   log likelihood = -298.42476
Refining estimates:
Iteration 0:   log likelihood = -298.42476

Cox regression -- Breslow method for ties
Entry time 0                                      Number of obs   =         86
                                                  LR chi2(1)      =       6.28
                                                  Prob > chi2     =     0.0122
Log likelihood = -298.42476                       Pseudo R2       =     0.0104

------------------------------------------------------------------------------
       time2 | Haz. Ratio   Std. Err.      z    P>|z|     [95% Conf. Interval]
-------------+----------------------------------------------------------------
        galb |   .5612077   .1278849    -2.54   0.011     .3590514    .8771839
------------------------------------------------------------------------------

. 
. cox time2 gcrp, dead(re) hr

Iteration 0:   log likelihood = -301.56621
Iteration 1:   log likelihood = -301.01691
Iteration 2:   log likelihood = -301.01617
Refining estimates:
Iteration 0:   log likelihood = -301.01617

Cox regression -- Breslow method for ties
Entry time 0                                      Number of obs   =         86
                                                  LR chi2(1)      =       1.10
                                                  Prob > chi2     =     0.2942
Log likelihood = -301.01617                       Pseudo R2       =     0.0018

------------------------------------------------------------------------------
       time2 | Haz. Ratio   Std. Err.      z    P>|z|     [95% Conf. Interval]
-------------+----------------------------------------------------------------
        gcrp |   1.284324   .3109397     1.03   0.301     .7990895    2.064209
------------------------------------------------------------------------------

. 
. cox time2 GPS, dead(re) hr

Iteration 0:   log likelihood = -301.56621
Iteration 1:   log likelihood =  -301.0889
Iteration 2:   log likelihood = -301.08753
Iteration 3:   log likelihood = -301.08753
Refining estimates:
Iteration 0:   log likelihood = -301.08753

Cox regression -- Breslow method for ties
Entry time 0                                      Number of obs   =         86
                                                  LR chi2(1)      =       0.96
                                                  Prob > chi2     =     0.3279
Log likelihood = -301.08753                       Pseudo R2       =     0.0016

------------------------------------------------------------------------------
       time2 | Haz. Ratio   Std. Err.      z    P>|z|     [95% Conf. Interval]
-------------+----------------------------------------------------------------
         GPS |   1.289115   .3415891     0.96   0.338     .7669037    2.166919
------------------------------------------------------------------------------

. 
. cox time2 gpt, dead(re) hr

Iteration 0:   log likelihood = -301.56621
Iteration 1:   log likelihood = -299.13199
Iteration 2:   log likelihood = -299.03934
Iteration 3:   log likelihood =  -299.0393
Refining estimates:
Iteration 0:   log likelihood =  -299.0393

Cox regression -- Breslow method for ties
Entry time 0                                      Number of obs   =         86
                                                  LR chi2(1)      =       5.05
                                                  Prob > chi2     =     0.0246
Log likelihood =  -299.0393                       Pseudo R2       =     0.0084

------------------------------------------------------------------------------
       time2 | Haz. Ratio   Std. Err.      z    P>|z|     [95% Conf. Interval]
-------------+----------------------------------------------------------------
         gpt |   1.826501   .4681396     2.35   0.019     1.105232    3.018466
------------------------------------------------------------------------------

. 
. cox time2 gaptt, dead(re) hr

Iteration 0:   log likelihood = -301.56621
Iteration 1:   log likelihood = -301.54518
Iteration 2:   log likelihood = -301.54518
Refining estimates:
Iteration 0:   log likelihood = -301.54518

Cox regression -- Breslow method for ties
Entry time 0                                      Number of obs   =         86
                                                  LR chi2(1)      =       0.04
                                                  Prob > chi2     =     0.8375
Log likelihood = -301.54518                       Pseudo R2       =     0.0001

------------------------------------------------------------------------------
       time2 | Haz. Ratio   Std. Err.      z    P>|z|     [95% Conf. Interval]
-------------+----------------------------------------------------------------
       gaptt |   .9496327   .2403068    -0.20   0.838     .5783051    1.559388
------------------------------------------------------------------------------

. 
. cox time2 gfib, dead(re) hr

Iteration 0:   log likelihood = -301.56621
Iteration 1:   log likelihood = -301.22011
Iteration 2:   log likelihood = -301.21913
Iteration 3:   log likelihood = -301.21913
Refining estimates:
Iteration 0:   log likelihood = -301.21913

Cox regression -- Breslow method for ties
Entry time 0                                      Number of obs   =         86
                                                  LR chi2(1)      =       0.69
                                                  Prob > chi2     =     0.4048
Log likelihood = -301.21913                       Pseudo R2       =     0.0012

------------------------------------------------------------------------------
       time2 | Haz. Ratio   Std. Err.      z    P>|z|     [95% Conf. Interval]
-------------+----------------------------------------------------------------
        gfib |   1.240063   .3153231     0.85   0.397     .7533562    2.041208
------------------------------------------------------------------------------

. 
. cox time2 gtt, dead(re) hr

Iteration 0:   log likelihood = -301.56621
Iteration 1:   log likelihood = -301.49537
Iteration 2:   log likelihood = -301.49536
Refining estimates:
Iteration 0:   log likelihood = -301.49536

Cox regression -- Breslow method for ties
Entry time 0                                      Number of obs   =         86
                                                  LR chi2(1)      =       0.14
                                                  Prob > chi2     =     0.7066
Log likelihood = -301.49536                       Pseudo R2       =     0.0002

------------------------------------------------------------------------------
       time2 | Haz. Ratio   Std. Err.      z    P>|z|     [95% Conf. Interval]
-------------+----------------------------------------------------------------
         gtt |   .9143834   .2186958    -0.37   0.708     .5721948     1.46121
------------------------------------------------------------------------------

. 
. cox time2 gdd, dead(re) hr

Iteration 0:   log likelihood = -301.56621
Iteration 1:   log likelihood = -300.65027
Iteration 2:   log likelihood = -300.64108
Iteration 3:   log likelihood = -300.64108
Refining estimates:
Iteration 0:   log likelihood = -300.64108

Cox regression -- Breslow method for ties
Entry time 0                                      Number of obs   =         86
                                                  LR chi2(1)      =       1.85
                                                  Prob > chi2     =     0.1738
Log likelihood = -300.64108                       Pseudo R2       =     0.0031

------------------------------------------------------------------------------
       time2 | Haz. Ratio   Std. Err.      z    P>|z|     [95% Conf. Interval]
-------------+----------------------------------------------------------------
         gdd |   1.410634   .3472535     1.40   0.162     .8707135    2.285352
------------------------------------------------------------------------------

. 
. cox time2 gca125, dead(re) hr

Iteration 0:   log likelihood = -301.56621
Iteration 1:   log likelihood = -301.52102
Iteration 2:   log likelihood = -301.52101
Refining estimates:
Iteration 0:   log likelihood = -301.52101

Cox regression -- Breslow method for ties
Entry time 0                                      Number of obs   =         86
                                                  LR chi2(1)      =       0.09
                                                  Prob > chi2     =     0.7637
Log likelihood = -301.52101                       Pseudo R2       =     0.0001

------------------------------------------------------------------------------
       time2 | Haz. Ratio   Std. Err.      z    P>|z|     [95% Conf. Interval]
-------------+----------------------------------------------------------------
      gca125 |   .9322381   .2184338    -0.30   0.765     .5889532    1.475614
------------------------------------------------------------------------------

. 
. cox time2 gca199, dead(re) hr

Iteration 0:   log likelihood = -301.56621
Iteration 1:   log likelihood = -300.84132
Iteration 2:   log likelihood = -300.83885
Iteration 3:   log likelihood = -300.83885
Refining estimates:
Iteration 0:   log likelihood = -300.83885

Cox regression -- Breslow method for ties
Entry time 0                                      Number of obs   =         86
                                                  LR chi2(1)      =       1.45
                                                  Prob > chi2     =     0.2278
Log likelihood = -300.83885                       Pseudo R2       =     0.0024

------------------------------------------------------------------------------
       time2 | Haz. Ratio   Std. Err.      z    P>|z|     [95% Conf. Interval]
-------------+----------------------------------------------------------------
      gca199 |   1.325516   .3047948     1.23   0.220     .8446094    2.080242
------------------------------------------------------------------------------

. 
. cox time2 gcea, dead(re) hr

Iteration 0:   log likelihood = -301.56621
Iteration 1:   log likelihood = -301.44864
Iteration 2:   log likelihood =  -301.4486
Refining estimates:
Iteration 0:   log likelihood =  -301.4486

Cox regression -- Breslow method for ties
Entry time 0                                      Number of obs   =         86
                                                  LR chi2(1)      =       0.24
                                                  Prob > chi2     =     0.6277
Log likelihood =  -301.4486                       Pseudo R2       =     0.0004

------------------------------------------------------------------------------
       time2 | Haz. Ratio   Std. Err.      z    P>|z|     [95% Conf. Interval]
-------------+----------------------------------------------------------------
        gcea |   1.119573   .2592551     0.49   0.626     .7111201    1.762632
------------------------------------------------------------------------------

. 
. cox time2 gage, dead(re) hr

Iteration 0:   log likelihood = -301.56621
Iteration 1:   log likelihood = -298.98116
Iteration 2:   log likelihood = -298.98032
Refining estimates:
Iteration 0:   log likelihood = -298.98032

Cox regression -- Breslow method for ties
Entry time 0                                      Number of obs   =         86
                                                  LR chi2(1)      =       5.17
                                                  Prob > chi2     =     0.0230
Log likelihood = -298.98032                       Pseudo R2       =     0.0086

------------------------------------------------------------------------------
       time2 | Haz. Ratio   Std. Err.      z    P>|z|     [95% Conf. Interval]
-------------+----------------------------------------------------------------
        gage |   1.649861    .364008     2.27   0.023     1.070649    2.542421
------------------------------------------------------------------------------

. cox time2 stage diff gage gpt galb, dead(re) hr

Iteration 0:   log likelihood = -301.56621
Iteration 1:   log likelihood =   -285.246
Iteration 2:   log likelihood = -284.05408
Iteration 3:   log likelihood = -284.05373
Refining estimates:
Iteration 0:   log likelihood = -284.05373

Cox regression -- Breslow method for ties
Entry time 0                                      Number of obs   =         86
                                                  LR chi2(5)      =      35.02
                                                  Prob > chi2     =     0.0000
Log likelihood = -284.05373                       Pseudo R2       =     0.0581

------------------------------------------------------------------------------
       time2 | Haz. Ratio   Std. Err.      z    P>|z|     [95% Conf. Interval]
-------------+----------------------------------------------------------------
       stage |   2.040285   .5519682     2.64   0.008     1.200635    3.467133
        diff |   3.089761    .897766     3.88   0.000     1.748229    5.460739
        gage |   1.336408   .3122416     1.24   0.215     .8453999    2.112593
         gpt |   1.825743   .5158992     2.13   0.033     1.049339    3.176605
        galb |   .9393092   .2587864    -0.23   0.820     .5473895    1.611835
------------------------------------------------------------------------------

. stset time1, failure(die)

     failure event:  die != 0 & die < .
obs. time interval:  (0, time1]
 exit on or before:  failure

------------------------------------------------------------------------------
       86  total observations
        0  exclusions
------------------------------------------------------------------------------
       86  observations remaining, representing
       86  failures in single-record/single-failure data
   1790.2  total analysis time at risk and under observation
                                              at risk from t =         0
                                   earliest observed entry t =         0
                                        last observed exit t =      95.8

. sts test gplt,logrank

         failure _d:  die
   analysis time _t:  time1


Log-rank test for equality of survivor functions

      |   Events         Events
gplt  |  observed       expected
------+-------------------------
1     |        64          56.62
2     |        22          29.38
------+-------------------------
Total |        86          86.00

            chi2(1) =       2.97
            Pr>chi2 =     0.0846

. 
. sts test gpdw,logrank

         failure _d:  die
   analysis time _t:  time1


Log-rank test for equality of survivor functions

      |   Events         Events
gpdw  |  observed       expected
------+-------------------------
1     |        64          62.57
2     |        22          23.43
------+-------------------------
Total |        86          86.00

            chi2(1) =       0.13
            Pr>chi2 =     0.7234

. 
. sts test gmpv,logrank

         failure _d:  die
   analysis time _t:  time1


Log-rank test for equality of survivor functions

      |   Events         Events
gmpv  |  observed       expected
------+-------------------------
1     |        64          67.28
2     |        22          18.72
------+-------------------------
Total |        86          86.00

            chi2(1) =       0.76
            Pr>chi2 =     0.3825

. 
. sts test glym,logrank

         failure _d:  die
   analysis time _t:  time1


Log-rank test for equality of survivor functions

      |   Events         Events
glym  |  observed       expected
------+-------------------------
1     |        64          56.33
2     |        22          29.67
------+-------------------------
Total |        86          86.00

            chi2(1) =       3.30
            Pr>chi2 =     0.0694

. 
. sts test gneu,logrank

         failure _d:  die
   analysis time _t:  time1


Log-rank test for equality of survivor functions

      |   Events         Events
gneu  |  observed       expected
------+-------------------------
1     |        64          66.30
2     |        22          19.70
------+-------------------------
Total |        86          86.00

            chi2(1) =       0.36
            Pr>chi2 =     0.5483

. 
. sts test gplr,logrank

         failure _d:  die
   analysis time _t:  time1


Log-rank test for equality of survivor functions

      |   Events         Events
gplr  |  observed       expected
------+-------------------------
1     |        66          65.09
2     |        20          20.91
------+-------------------------
Total |        86          86.00

            chi2(1) =       0.06
            Pr>chi2 =     0.8121

. 
. sts test gnlr,logrank

         failure _d:  die
   analysis time _t:  time1


Log-rank test for equality of survivor functions

      |   Events         Events
gnlr  |  observed       expected
------+-------------------------
1     |        65          72.76
2     |        21          13.24
------+-------------------------
Total |        86          86.00

            chi2(1) =       5.67
            Pr>chi2 =     0.0173

. 
. sts test galb,logrank

         failure _d:  die
   analysis time _t:  time1


Log-rank test for equality of survivor functions

      |   Events         Events
galb  |  observed       expected
------+-------------------------
1     |        38          28.79
2     |        48          57.21
------+-------------------------
Total |        86          86.00

            chi2(1) =       4.76
            Pr>chi2 =     0.0290

. 
. sts test gcrp,logrank

         failure _d:  die
   analysis time _t:  time1


Log-rank test for equality of survivor functions

      |   Events         Events
gcrp  |  observed       expected
------+-------------------------
1     |        25          29.77
2     |        61          56.23
------+-------------------------
Total |        86          86.00

            chi2(1) =       1.24
            Pr>chi2 =     0.2657

. 
. sts test gca199,logrank

         failure _d:  die
   analysis time _t:  time1


Log-rank test for equality of survivor functions

       |   Events         Events
gca199 |  observed       expected
-------+-------------------------
1      |        57          62.36
2      |        29          23.64
-------+-------------------------
Total  |        86          86.00

             chi2(1) =       1.73
             Pr>chi2 =     0.1886

. 
. sts test gca125,logrank

         failure _d:  die
   analysis time _t:  time1


Log-rank test for equality of survivor functions

       |   Events         Events
gca125 |  observed       expected
-------+-------------------------
1      |        59          58.44
2      |        27          27.56
-------+-------------------------
Total  |        86          86.00

             chi2(1) =       0.02
             Pr>chi2 =     0.8950

. 
. sts test gcea,logrank

         failure _d:  die
   analysis time _t:  time1


Log-rank test for equality of survivor functions

      |   Events         Events
gcea  |  observed       expected
------+-------------------------
1     |        57          60.88
2     |        29          25.12
------+-------------------------
Total |        86          86.00

            chi2(1) =       0.89
            Pr>chi2 =     0.3447

. 
. sts test gaptt,logrank

         failure _d:  die
   analysis time _t:  time1


Log-rank test for equality of survivor functions

      |   Events         Events
gaptt |  observed       expected
------+-------------------------
1     |        64          61.72
2     |        22          24.28
------+-------------------------
Total |        86          86.00

            chi2(1) =       0.32
            Pr>chi2 =     0.5730

. 
. sts test gdd,logrank

         failure _d:  die
   analysis time _t:  time1


Log-rank test for equality of survivor functions

      |   Events         Events
gdd   |  observed       expected
------+-------------------------
1     |        62          65.67
2     |        24          20.33
------+-------------------------
Total |        86          86.00

            chi2(1) =       0.93
            Pr>chi2 =     0.3356

. 
. sts test ginr,logrank

         failure _d:  die
   analysis time _t:  time1


Log-rank test for equality of survivor functions

      |   Events         Events
ginr  |  observed       expected
------+-------------------------
1     |        64          71.15
2     |        22          14.85
------+-------------------------
Total |        86          86.00

            chi2(1) =       4.34
            Pr>chi2 =     0.0373

. 
. sts test gfib,logrank

         failure _d:  die
   analysis time _t:  time1


Log-rank test for equality of survivor functions

      |   Events         Events
gfib  |  observed       expected
------+-------------------------
1     |        64          68.69
2     |        22          17.31
------+-------------------------
Total |        86          86.00

            chi2(1) =       1.72
            Pr>chi2 =     0.1900

. 
. sts test gpt,logrank

         failure _d:  die
   analysis time _t:  time1


Log-rank test for equality of survivor functions

      |   Events         Events
gpt   |  observed       expected
------+-------------------------
1     |        64          71.15
2     |        22          14.85
------+-------------------------
Total |        86          86.00

            chi2(1) =       4.34
            Pr>chi2 =     0.0373

. 
. sts test gtt,logrank

         failure _d:  die
   analysis time _t:  time1


Log-rank test for equality of survivor functions

      |   Events         Events
gtt   |  observed       expected
------+-------------------------
1     |        61          60.84
2     |        25          25.16
------+-------------------------
Total |        86          86.00

            chi2(1) =       0.00
            Pr>chi2 =     0.9689

. 
. 
. sts test  GPS,logrank

         failure _d:  die
   analysis time _t:  time1


Log-rank test for equality of survivor functions

      |   Events         Events
GPS   |  observed       expected
------+-------------------------
0     |        19          21.71
1     |        67          64.29
------+-------------------------
Total |        86          86.00

            chi2(1) =       0.48
            Pr>chi2 =     0.4890

. 
. 
. sts graph, by(galb)

         failure _d:  die
   analysis time _t:  time1

. graph save Graph "C:\Users\whs\Desktop\alb-os.gph"
(file C:\Users\whs\Desktop\alb-os.gph saved)
sts test diff, logrank

         failure _d:  die
   analysis time _t:  time1


Log-rank test for equality of survivor functions

      |   Events         Events
diff  |  observed       expected
------+-------------------------
1     |        57          72.74
2     |        29          13.26
------+-------------------------
Total |        86          86.00

            chi2(1) =      24.96
            Pr>chi2 =     0.0000

. 
. sts test stage, logrank

         failure _d:  die
   analysis time _t:  time1


Log-rank test for equality of survivor functions

      |   Events         Events
stage |  observed       expected
------+-------------------------
1     |        62          70.56
2     |        24          15.44
------+-------------------------
Total |        86          86.00

            chi2(1) =       6.22
            Pr>chi2 =     0.0126

. stset time2, failure(re)

     failure event:  re != 0 & re < .
obs. time interval:  (0, time2]
 exit on or before:  failure

------------------------------------------------------------------------------
       86  total observations
        0  exclusions
------------------------------------------------------------------------------
       86  observations remaining, representing
       86  failures in single-record/single-failure data
   1320.4  total analysis time at risk and under observation
                                              at risk from t =         0
                                   earliest observed entry t =         0
                                        last observed exit t =      95.8

. sts test gplt,logrank

         failure _d:  re
   analysis time _t:  time2


Log-rank test for equality of survivor functions

      |   Events         Events
gplt  |  observed       expected
------+-------------------------
1     |        64          57.35
2     |        22          28.65
------+-------------------------
Total |        86          86.00

            chi2(1) =       2.48
            Pr>chi2 =     0.1154

. 
. sts test gpdw,logrank

         failure _d:  re
   analysis time _t:  time2


Log-rank test for equality of survivor functions

      |   Events         Events
gpdw  |  observed       expected
------+-------------------------
1     |        64          63.93
2     |        22          22.07
------+-------------------------
Total |        86          86.00

            chi2(1) =       0.00
            Pr>chi2 =     0.9862

. 
. sts test gmpv,logrank

         failure _d:  re
   analysis time _t:  time2


Log-rank test for equality of survivor functions

      |   Events         Events
gmpv  |  observed       expected
------+-------------------------
1     |        64          65.51
2     |        22          20.49
------+-------------------------
Total |        86          86.00

            chi2(1) =       0.15
            Pr>chi2 =     0.6952

. 
. sts test glym,logrank

         failure _d:  re
   analysis time _t:  time2


Log-rank test for equality of survivor functions

      |   Events         Events
glym  |  observed       expected
------+-------------------------
1     |        64          57.75
2     |        22          28.25
------+-------------------------
Total |        86          86.00

            chi2(1) =       2.24
            Pr>chi2 =     0.1348

. 
. sts test gneu,logrank

         failure _d:  re
   analysis time _t:  time2


Log-rank test for equality of survivor functions

      |   Events         Events
gneu  |  observed       expected
------+-------------------------
1     |        64          66.14
2     |        22          19.86
------+-------------------------
Total |        86          86.00

            chi2(1) =       0.31
            Pr>chi2 =     0.5754

. 
. sts test gplr,logrank

         failure _d:  re
   analysis time _t:  time2


Log-rank test for equality of survivor functions

      |   Events         Events
gplr  |  observed       expected
------+-------------------------
1     |        66          65.72
2     |        20          20.28
------+-------------------------
Total |        86          86.00

            chi2(1) =       0.01
            Pr>chi2 =     0.9405

. 
. sts test gnlr,logrank

         failure _d:  re
   analysis time _t:  time2


Log-rank test for equality of survivor functions

      |   Events         Events
gnlr  |  observed       expected
------+-------------------------
1     |        65          71.33
2     |        21          14.67
------+-------------------------
Total |        86          86.00

            chi2(1) =       3.48
            Pr>chi2 =     0.0621

. 
. sts test galb,logrank

         failure _d:  re
   analysis time _t:  time2


Log-rank test for equality of survivor functions

      |   Events         Events
galb  |  observed       expected
------+-------------------------
1     |        38          27.31
2     |        48          58.69
------+-------------------------
Total |        86          86.00

            chi2(1) =       6.82
            Pr>chi2 =     0.0090

. 
. sts test gcrp,logrank

         failure _d:  re
   analysis time _t:  time2


Log-rank test for equality of survivor functions

      |   Events         Events
gcrp  |  observed       expected
------+-------------------------
1     |        25          29.46
2     |        61          56.54
------+-------------------------
Total |        86          86.00

            chi2(1) =       1.11
            Pr>chi2 =     0.2919

. 
. sts test gca199,logrank

         failure _d:  re
   analysis time _t:  time2


Log-rank test for equality of survivor functions

       |   Events         Events
gca199 |  observed       expected
-------+-------------------------
1      |        57          62.07
2      |        29          23.93
-------+-------------------------
Total  |        86          86.00

             chi2(1) =       1.56
             Pr>chi2 =     0.2117

. 
. sts test gca125,logrank

         failure _d:  re
   analysis time _t:  time2


Log-rank test for equality of survivor functions

       |   Events         Events
gca125 |  observed       expected
-------+-------------------------
1      |        59          57.71
2      |        27          28.29
-------+-------------------------
Total  |        86          86.00

             chi2(1) =       0.09
             Pr>chi2 =     0.7607

. 
. sts test gcea,logrank

         failure _d:  re
   analysis time _t:  time2


Log-rank test for equality of survivor functions

      |   Events         Events
gcea  |  observed       expected
------+-------------------------
1     |        57          59.07
2     |        29          26.93
------+-------------------------
Total |        86          86.00

            chi2(1) =       0.25
            Pr>chi2 =     0.6197

. 
. sts test gaptt,logrank

         failure _d:  re
   analysis time _t:  time2


Log-rank test for equality of survivor functions

      |   Events         Events
gaptt |  observed       expected
------+-------------------------
1     |        64          63.18
2     |        22          22.82
------+-------------------------
Total |        86          86.00

            chi2(1) =       0.04
            Pr>chi2 =     0.8356

. 
. sts test gdd,logrank

         failure _d:  re
   analysis time _t:  time2


Log-rank test for equality of survivor functions

      |   Events         Events
gdd   |  observed       expected
------+-------------------------
1     |        62          67.23
2     |        24          18.77
------+-------------------------
Total |        86          86.00

            chi2(1) =       2.04
            Pr>chi2 =     0.1537

. 
. sts test ginr,logrank

         failure _d:  re
   analysis time _t:  time2


Log-rank test for equality of survivor functions

      |   Events         Events
ginr  |  observed       expected
------+-------------------------
1     |        64          71.98
2     |        22          14.02
------+-------------------------
Total |        86          86.00

            chi2(1) =       5.90
            Pr>chi2 =     0.0151

. 
. sts test gfib,logrank

         failure _d:  re
   analysis time _t:  time2


Log-rank test for equality of survivor functions

      |   Events         Events
gfib  |  observed       expected
------+-------------------------
1     |        64          67.17
2     |        22          18.83
------+-------------------------
Total |        86          86.00

            chi2(1) =       0.75
            Pr>chi2 =     0.3878

. 
. sts test gpt,logrank

         failure _d:  re
   analysis time _t:  time2


Log-rank test for equality of survivor functions

      |   Events         Events
gpt   |  observed       expected
------+-------------------------
1     |        64          71.98
2     |        22          14.02
------+-------------------------
Total |        86          86.00

            chi2(1) =       5.90
            Pr>chi2 =     0.0151

. 
. sts test gtt,logrank

         failure _d:  re
   analysis time _t:  time2


Log-rank test for equality of survivor functions

      |   Events         Events
gtt   |  observed       expected
------+-------------------------
1     |        61          59.41
2     |        25          26.59
------+-------------------------
Total |        86          86.00

            chi2(1) =       0.14
            Pr>chi2 =     0.7037

. 
. sts test diff, logrank

         failure _d:  re
   analysis time _t:  time2


Log-rank test for equality of survivor functions

      |   Events         Events
diff  |  observed       expected
------+-------------------------
1     |        57          72.52
2     |        29          13.48
------+-------------------------
Total |        86          86.00

            chi2(1) =      24.81
            Pr>chi2 =     0.0000

. 
. sts test stage, logrank

         failure _d:  re
   analysis time _t:  time2


Log-rank test for equality of survivor functions

      |   Events         Events
stage |  observed       expected
------+-------------------------
1     |        62          71.96
2     |        24          14.04
------+-------------------------
Total |        86          86.00

            chi2(1) =       9.52
            Pr>chi2 =     0.0020

. sts test GPS, logrank

         failure _d:  re
   analysis time _t:  time2


Log-rank test for equality of survivor functions

      |   Events         Events
GPS   |  observed       expected
------+-------------------------
0     |        19          22.84
1     |        67          63.16
------+-------------------------
Total |        86          86.00

            chi2(1) =       0.96
            Pr>chi2 =     0.3282

. sts graph, by(galb)

         failure _d:  re
   analysis time _t:  time2

. graph save Graph "C:\Users\whs\Desktop\RFS-ALB.gph"
(file C:\Users\whs\Desktop\RFS-ALB.gph saved)
graph save Graph "C:\Users\whs\Desktop\RFS-ALB.gph", replace
(file C:\Users\whs\Desktop\RFS-ALB.gph saved)
sts graph, by(gpt)

         failure _d:  re
   analysis time _t:  time2

. graph save Graph "C:\Users\whs\Desktop\RFS-PT.gph"
(file C:\Users\whs\Desktop\RFS-PT.gph saved)
graph save Graph "C:\Users\whs\Desktop\RFS-PT.gph", replace
(file C:\Users\whs\Desktop\RFS-PT.gph saved)
stset time1, failure(die)

     failure event:  die != 0 & die < .
obs. time interval:  (0, time1]
 exit on or before:  failure

------------------------------------------------------------------------------
       86  total observations
        0  exclusions
------------------------------------------------------------------------------
       86  observations remaining, representing
       86  failures in single-record/single-failure data
   1790.2  total analysis time at risk and under observation
                                              at risk from t =         0
                                   earliest observed entry t =         0
                                        last observed exit t =      95.8

. sts graph, by(galb)

         failure _d:  die
   analysis time _t:  time1

. graph save Graph "C:\Users\whs\Desktop\alb-os.gph", replace
(file C:\Users\whs\Desktop\alb-os.gph saved)
graph save Graph "C:\Users\whs\Desktop\alb-os.gph", replace
(file C:\Users\whs\Desktop\alb-os.gph saved)
sts graph, by(gpt)

         failure _d:  die
   analysis time _t:  time1

. graph save Graph "C:\Users\whs\Desktop\PT-OS.gph"
(file C:\Users\whs\Desktop\PT-OS.gph saved)
sts graph, by(gnlr)

         failure _d:  die
   analysis time _t:  time1

. graph save Graph "C:\Users\whs\Desktop\NLR-os.gph"
(file C:\Users\whs\Desktop\NLR-os.gph saved)
graph save Graph "C:\Users\whs\Desktop\NLR-os.gph", replace
(file C:\Users\whs\Desktop\NLR-os.gph saved)
graph save Graph "C:\Users\whs\Desktop\NLR-os.gph", replace
(file C:\Users\whs\Desktop\NLR-os.gph saved)
graph save Graph "C:\Users\whs\Desktop\NLR-os.gph", replace
(file C:\Users\whs\Desktop\NLR-os.gph saved)
graph save Graph "C:\Users\whs\Desktop\NLR-os.gph", replace
(file C:\Users\whs\Desktop\NLR-os.gph saved)
save "C:\Users\whs\Desktop\0420.dta"
file C:\Users\whs\Desktop\0420.dta saved

. 
---------------------------------------------------------------------------------------------------------------------------------------------
      name:  <unnamed>
       log:  C:\Users\whs\Desktop\PT�޻�\0423.log
  log type:  text
 opened on:  23 Apr 2019, 08:47:39

. import excel "C:\Users\whs\Desktop\PT�޻�\ͳ�Ʊ�201904.xlsx", sheet("��������") firstrow

. gen gca199=0

. 
. replace gca199=1 if ca199<37
(28 real changes made)

. 
. replace gca199=2 if ca199>=37
(58 real changes made)

. cox time1 gca199, dead(die)

Iteration 0:   log likelihood = -301.02275
Iteration 1:   log likelihood = -300.39565
Iteration 2:   log likelihood = -300.39486
Refining estimates:
Iteration 0:   log likelihood = -300.39486

Cox regression -- Breslow method for ties
Entry time 0                                      Number of obs   =         86
                                                  LR chi2(1)      =       1.26
                                                  Prob > chi2     =     0.2625
Log likelihood = -300.39486                       Pseudo R2       =     0.0021

------------------------------------------------------------------------------
       time1 |      Coef.   Std. Err.      z    P>|z|     [95% Conf. Interval]
-------------+----------------------------------------------------------------
      gca199 |   .2587153   .2342262     1.10   0.269    -.2003596    .7177903
------------------------------------------------------------------------------

. set more off

. cox time2 gca199, dead(re)

Iteration 0:   log likelihood = -301.56621
Iteration 1:   log likelihood = -301.27121
Iteration 2:   log likelihood =   -301.271
Refining estimates:
Iteration 0:   log likelihood =   -301.271

Cox regression -- Breslow method for ties
Entry time 0                                      Number of obs   =         86
                                                  LR chi2(1)      =       0.59
                                                  Prob > chi2     =     0.4423
Log likelihood =   -301.271                       Pseudo R2       =     0.0010

------------------------------------------------------------------------------
       time2 |      Coef.   Std. Err.      z    P>|z|     [95% Conf. Interval]
-------------+----------------------------------------------------------------
      gca199 |   .1778459   .2338117     0.76   0.447    -.2804167    .6361084
------------------------------------------------------------------------------

. cox time1 gca199, dead(die) hr

Iteration 0:   log likelihood = -301.02275
Iteration 1:   log likelihood = -300.39565
Iteration 2:   log likelihood = -300.39486
Refining estimates:
Iteration 0:   log likelihood = -300.39486

Cox regression -- Breslow method for ties
Entry time 0                                      Number of obs   =         86
                                                  LR chi2(1)      =       1.26
                                                  Prob > chi2     =     0.2625
Log likelihood = -300.39486                       Pseudo R2       =     0.0021

------------------------------------------------------------------------------
       time1 | Haz. Ratio   Std. Err.      z    P>|z|     [95% Conf. Interval]
-------------+----------------------------------------------------------------
      gca199 |   1.295265   .3033851     1.10   0.269     .8184364    2.049899
------------------------------------------------------------------------------

. cox time2 gca199, dead(re) hr

Iteration 0:   log likelihood = -301.56621
Iteration 1:   log likelihood = -301.27121
Iteration 2:   log likelihood =   -301.271
Refining estimates:
Iteration 0:   log likelihood =   -301.271

Cox regression -- Breslow method for ties
Entry time 0                                      Number of obs   =         86
                                                  LR chi2(1)      =       0.59
                                                  Prob > chi2     =     0.4423
Log likelihood =   -301.271                       Pseudo R2       =     0.0010

------------------------------------------------------------------------------
       time2 | Haz. Ratio   Std. Err.      z    P>|z|     [95% Conf. Interval]
-------------+----------------------------------------------------------------
      gca199 |   1.194641   .2793211     0.76   0.447     .7554689    1.889115
------------------------------------------------------------------------------

. stset time2, failure(re)

     failure event:  re != 0 & re < .
obs. time interval:  (0, time2]
 exit on or before:  failure

------------------------------------------------------------------------------
       86  total observations
        0  exclusions
------------------------------------------------------------------------------
       86  observations remaining, representing
       86  failures in single-record/single-failure data
   1320.4  total analysis time at risk and under observation
                                              at risk from t =         0
                                   earliest observed entry t =         0
                                        last observed exit t =      95.8

. sts test gca199,logrank

         failure _d:  re
   analysis time _t:  time2


Log-rank test for equality of survivor functions

       |   Events         Events
gca199 |  observed       expected
-------+-------------------------
1      |        28          31.35
2      |        58          54.65
-------+-------------------------
Total  |        86          86.00

             chi2(1) =       0.60
             Pr>chi2 =     0.4389

. stset time1, failure(die)

     failure event:  die != 0 & die < .
obs. time interval:  (0, time1]
 exit on or before:  failure

------------------------------------------------------------------------------
       86  total observations
        0  exclusions
------------------------------------------------------------------------------
       86  observations remaining, representing
       86  failures in single-record/single-failure data
   1790.2  total analysis time at risk and under observation
                                              at risk from t =         0
                                   earliest observed entry t =         0
                                        last observed exit t =      95.8

. sts test gca199,logrank

         failure _d:  die
   analysis time _t:  time1


Log-rank test for equality of survivor functions

       |   Events         Events
gca199 |  observed       expected
-------+-------------------------
1      |        28          32.92
2      |        58          53.08
-------+-------------------------
Total  |        86          86.00

             chi2(1) =       1.25
             Pr>chi2 =     0.2634

. tabstat time1, stat (mean) by (gca199)

Summary for variables: time1
     by categories of: gca199 

  gca199 |      mean
---------+----------
       1 |  24.07143
       2 |  19.24483
---------+----------
   Total |  20.81628
--------------------

. sdtest time1, by (gca199)

Variance ratio test
------------------------------------------------------------------------------
   Group |     Obs        Mean    Std. Err.   Std. Dev.   [95% Conf. Interval]
---------+--------------------------------------------------------------------
       1 |      28    24.07143    4.087281    21.62786    15.68502    32.45784
       2 |      58    19.24483    2.302875    17.53817     14.6334    23.85625
---------+--------------------------------------------------------------------
combined |      86    20.81628    2.046051     18.9743    16.74818    24.88438
------------------------------------------------------------------------------
    ratio = sd(1) / sd(2)                                         f =   1.5208
Ho: ratio = 1                                    degrees of freedom =   27, 57

    Ha: ratio < 1               Ha: ratio != 1                 Ha: ratio > 1
  Pr(F < f) = 0.9079         2*Pr(F > f) = 0.1842           Pr(F > f) = 0.0921

. oneway time1 gca199

                        Analysis of Variance
    Source              SS         df      MS            F     Prob > F
------------------------------------------------------------------------
Between groups      439.916618      1   439.916618      1.23     0.2715
 Within groups      30162.1206     84   359.072864
------------------------------------------------------------------------
    Total           30602.0372     85   360.023967

Bartlett's test for equal variances:  chi2(1) =   1.6582  Prob>chi2 = 0.198

. gen gage=0

. 
. replace gage=1 if age<64
(40 real changes made)

. 
. replace gage=2 if age>=64
(46 real changes made)

. 
. 
. 
. gen gplt=0

. 
. replace gplt=1 if plt<258.67
(64 real changes made)

. 
. replace gplt=2 if plt>=258.67
(22 real changes made)

. 
. 
. 
. gen gplr=0

. 
. replace gplr=1 if plr<240.18replace gplr=2 if plr>=233.75
18replace invalid name
r(198);

. 
. 
. 
. gen gnlr=0

. 
. replace gnlr=1 if nlr<6.17
(65 real changes made)

. 
. replace gnlr=2 if nlr>=6.17
(21 real changes made)

. 
. 
. 
. 
. 
. 
. 
. 
. 
. gen gca125=0

. 
. replace gca125=1 if ca125<36.49
(59 real changes made)

. 
. replace gca125=2 if ca125>=36.49
(27 real changes made)

. 
. 
. 
. gen gcea=0

. 
. replace gcea=1 if cea<5.1
(57 real changes made)

. 
. replace gcea=2 if cea>=5.1
(29 real changes made)

. 
. 
. 
. gen gaptt=0

. 
. replace gaptt=1 if aptt<30.8
(64 real changes made)

. 
. replace gaptt=2 if aptt>=30.8
(22 real changes made)

. 
. 
. 
. gen gdd=0

. 
. replace gdd=1 if dd<1.14
(62 real changes made)

. 
. replace gdd=2 if dd>=1.14
(24 real changes made)

. 
. 
. 
. gen gfib=0

. 
. replace gfib=1 if fib<4.49
(65 real changes made)

. 
. replace gfib=2 if fib>=4.49
(21 real changes made)

. 
. 
. 
. gen ginr=0

. 
. replace ginr=1 if inr<1.07
(64 real changes made)

. 
. replace ginr=2 if inr>=1.07
(22 real changes made)

. 
. 
. 
. gen gpt=0

. 
. replace gpt=1 if pt<12.3
(64 real changes made)

. 
. replace gpt=2 if pt>=12.3
(22 real changes made)

. 
. 
. 
. gen gtt=0

. 
. replace gtt=1 if tt<18.7
(61 real changes made)

. 
. replace gtt=2 if tt>=18.7
(25 real changes made)

. 
. 
. 
. 
. 
. gen gpdw=0

. 
. replace gpdw=1 if pdw<17.99 
(64 real changes made)

. 
. replace gpdw=2 if pdw>=17.99
(22 real changes made)

. 
. 
. 
. gen gmpv=0

. 
. replace gmpv=1 if mpv<12.46
(64 real changes made)

. 
. replace gmpv=2 if mpv>=12.46
(22 real changes made)

. 
. 
. 
. gen gneu=0

. 
. replace gneu=1 if neu<7.12
(64 real changes made)

. 
. replace gneu=2 if neu>=7.12
(22 real changes made)

. 
. 
. 
. gen glym=0

. 
. replace glym=1 if lym<1.5
(64 real changes made)

. 
. replace glym=2 if lym>=1.5
(22 real changes made)

. 
. 
. 
. gen galb=0

. 
. replace galb=1 if alb<35
(38 real changes made)

. 
. replace galb=2 if alb>=35
(48 real changes made)

. 
. 
. 
. gen gcrp=0

. 
. replace gcrp=1 if crp<10
(25 real changes made)

. 
. replace gcrp=2 if crp>=10
(61 real changes made)

. replace gplr=1 if plr<240.18replace gplr=2 if plr>=233.75
18replace invalid name
r(198);

. replace gplr=1 if plr<240.18
(66 real changes made)

. replace gplr=2 if plr>=240.18
(20 real changes made)

. replace GPS=1 if GPS==2
(36 real changes made)

. tabstat time1, stat (mean) by (gca125)

Summary for variables: time1
     by categories of: gca125 

  gca125 |      mean
---------+----------
       1 |  20.59661
       2 |   21.2963
---------+----------
   Total |  20.81628
--------------------

. 
. sdtest time1, by (gca125)

Variance ratio test
------------------------------------------------------------------------------
   Group |     Obs        Mean    Std. Err.   Std. Dev.   [95% Conf. Interval]
---------+--------------------------------------------------------------------
       1 |      59    20.59661    2.622188     20.1414    15.34773    25.84549
       2 |      27     21.2963    3.172116     16.4828    14.77592    27.81667
---------+--------------------------------------------------------------------
combined |      86    20.81628    2.046051     18.9743    16.74818    24.88438
------------------------------------------------------------------------------
    ratio = sd(1) / sd(2)                                         f =   1.4932
Ho: ratio = 1                                    degrees of freedom =   58, 26

    Ha: ratio < 1               Ha: ratio != 1                 Ha: ratio > 1
  Pr(F < f) = 0.8683         2*Pr(F > f) = 0.2634           Pr(F > f) = 0.1317

. 
. oneway time1 gca125

                        Analysis of Variance
    Source              SS         df      MS            F     Prob > F
------------------------------------------------------------------------
Between groups      9.06825764      1   9.06825764      0.02     0.8750
 Within groups       30592.969     84   364.202011
------------------------------------------------------------------------
    Total           30602.0372     85   360.023967

Bartlett's test for equal variances:  chi2(1) =   1.3452  Prob>chi2 = 0.246

. 
. tabstat time1, stat (mean) by (gcea)

Summary for variables: time1
     by categories of: gcea 

    gcea |      mean
---------+----------
       1 |  22.34035
       2 |  17.82069
---------+----------
   Total |  20.81628
--------------------

. 
. sdtest time1, by (gcea)

Variance ratio test
------------------------------------------------------------------------------
   Group |     Obs        Mean    Std. Err.   Std. Dev.   [95% Conf. Interval]
---------+--------------------------------------------------------------------
       1 |      57    22.34035    2.849738    21.51505    16.63164    28.04906
       2 |      29    17.82069    2.297768    12.37386    13.11392    22.52745
---------+--------------------------------------------------------------------
combined |      86    20.81628    2.046051     18.9743    16.74818    24.88438
------------------------------------------------------------------------------
    ratio = sd(1) / sd(2)                                         f =   3.0233
Ho: ratio = 1                                    degrees of freedom =   56, 28

    Ha: ratio < 1               Ha: ratio != 1                 Ha: ratio > 1
  Pr(F < f) = 0.9989         2*Pr(F > f) = 0.0021           Pr(F > f) = 0.0011

. 
. oneway time1 gcea

                        Analysis of Variance
    Source              SS         df      MS            F     Prob > F
------------------------------------------------------------------------
Between groups       392.63243      1    392.63243      1.09     0.2991
 Within groups      30209.4048     84   359.635771
------------------------------------------------------------------------
    Total           30602.0372     85   360.023967

Bartlett's test for equal variances:  chi2(1) =   9.6407  Prob>chi2 = 0.002

. 
. tabstat time1, stat (mean) by (galb)

Summary for variables: time1
     by categories of: galb 

    galb |      mean
---------+----------
       1 |  15.99211
       2 |  24.63542
---------+----------
   Total |  20.81628
--------------------

. 
. sdtest time1, by (galb)

Variance ratio test
------------------------------------------------------------------------------
   Group |     Obs        Mean    Std. Err.   Std. Dev.   [95% Conf. Interval]
---------+--------------------------------------------------------------------
       1 |      38    15.99211    1.938519    11.94984    12.06429    19.91992
       2 |      48    24.63542    3.243516    22.47174     18.1103    31.16053
---------+--------------------------------------------------------------------
combined |      86    20.81628    2.046051     18.9743    16.74818    24.88438
------------------------------------------------------------------------------
    ratio = sd(1) / sd(2)                                         f =   0.2828
Ho: ratio = 1                                    degrees of freedom =   37, 47

    Ha: ratio < 1               Ha: ratio != 1                 Ha: ratio > 1
  Pr(F < f) = 0.0001         2*Pr(F < f) = 0.0001           Pr(F > f) = 0.9999

. 
. oneway time1 galb

                        Analysis of Variance
    Source              SS         df      MS            F     Prob > F
------------------------------------------------------------------------
Between groups      1584.47979      1   1584.47979      4.59     0.0351
 Within groups      29017.5574     84   345.447112
------------------------------------------------------------------------
    Total           30602.0372     85   360.023967

Bartlett's test for equal variances:  chi2(1) =  14.6632  Prob>chi2 = 0.000

. 
. tabstat time1, stat (mean) by (gcrp)

Summary for variables: time1
     by categories of: gcrp 

    gcrp |      mean
---------+----------
       1 |    23.292
       2 |  19.80164
---------+----------
   Total |  20.81628
--------------------

. 
. sdtest time1, by (gcrp)

Variance ratio test
------------------------------------------------------------------------------
   Group |     Obs        Mean    Std. Err.   Std. Dev.   [95% Conf. Interval]
---------+--------------------------------------------------------------------
       1 |      25      23.292     2.73427    13.67135    17.64874    28.93526
       2 |      61    19.80164    2.660184     20.7767    14.48048     25.1228
---------+--------------------------------------------------------------------
combined |      86    20.81628    2.046051     18.9743    16.74818    24.88438
------------------------------------------------------------------------------
    ratio = sd(1) / sd(2)                                         f =   0.4330
Ho: ratio = 1                                    degrees of freedom =   24, 60

    Ha: ratio < 1               Ha: ratio != 1                 Ha: ratio > 1
  Pr(F < f) = 0.0130         2*Pr(F < f) = 0.0260           Pr(F > f) = 0.9870

. 
. oneway time1 gcrp

                        Analysis of Variance
    Source              SS         df      MS            F     Prob > F
------------------------------------------------------------------------
Between groups      216.028973      1   216.028973      0.60     0.4418
 Within groups      30386.0082     84   361.738193
------------------------------------------------------------------------
    Total           30602.0372     85   360.023967

Bartlett's test for equal variances:  chi2(1) =   5.1631  Prob>chi2 = 0.023

. 
. tabstat time1, stat (mean) by (GPS)

Summary for variables: time1
     by categories of: GPS (GPS)

     GPS |      mean
---------+----------
       0 |  22.67895
       1 |  20.28806
---------+----------
   Total |  20.81628
--------------------

. 
. sdtest time1, by (GPS)

Variance ratio test
------------------------------------------------------------------------------
   Group |     Obs        Mean    Std. Err.   Std. Dev.   [95% Conf. Interval]
---------+--------------------------------------------------------------------
       0 |      19    22.67895    2.612348    11.38696    17.19061    28.16729
       1 |      67    20.28806    2.524574    20.66452    15.24759    25.32853
---------+--------------------------------------------------------------------
combined |      86    20.81628    2.046051     18.9743    16.74818    24.88438
------------------------------------------------------------------------------
    ratio = sd(0) / sd(1)                                         f =   0.3036
Ho: ratio = 1                                    degrees of freedom =   18, 66

    Ha: ratio < 1               Ha: ratio != 1                 Ha: ratio > 1
  Pr(F < f) = 0.0033         2*Pr(F < f) = 0.0066           Pr(F > f) = 0.9967

. 
. oneway time1 GPS

                        Analysis of Variance
    Source              SS         df      MS            F     Prob > F
------------------------------------------------------------------------
Between groups      84.6151826      1   84.6151826      0.23     0.6306
 Within groups       30517.422     84   363.302643
------------------------------------------------------------------------
    Total           30602.0372     85   360.023967

Bartlett's test for equal variances:  chi2(1) =   7.7282  Prob>chi2 = 0.005

. 
. tabstat time1, stat (mean) by (GPS)

Summary for variables: time1
     by categories of: GPS (GPS)

     GPS |      mean
---------+----------
       0 |  22.67895
       1 |  20.28806
---------+----------
   Total |  20.81628
--------------------

. 
. sdtest time1, by (GPS)

Variance ratio test
------------------------------------------------------------------------------
   Group |     Obs        Mean    Std. Err.   Std. Dev.   [95% Conf. Interval]
---------+--------------------------------------------------------------------
       0 |      19    22.67895    2.612348    11.38696    17.19061    28.16729
       1 |      67    20.28806    2.524574    20.66452    15.24759    25.32853
---------+--------------------------------------------------------------------
combined |      86    20.81628    2.046051     18.9743    16.74818    24.88438
------------------------------------------------------------------------------
    ratio = sd(0) / sd(1)                                         f =   0.3036
Ho: ratio = 1                                    degrees of freedom =   18, 66

    Ha: ratio < 1               Ha: ratio != 1                 Ha: ratio > 1
  Pr(F < f) = 0.0033         2*Pr(F < f) = 0.0066           Pr(F > f) = 0.9967

. 
. oneway time1 GPS

                        Analysis of Variance
    Source              SS         df      MS            F     Prob > F
------------------------------------------------------------------------
Between groups      84.6151826      1   84.6151826      0.23     0.6306
 Within groups       30517.422     84   363.302643
------------------------------------------------------------------------
    Total           30602.0372     85   360.023967

Bartlett's test for equal variances:  chi2(1) =   7.7282  Prob>chi2 = 0.005

. 
. tabstat time1, stat (mean) by (gage)

Summary for variables: time1
     by categories of: gage 

    gage |      mean
---------+----------
       1 |   25.6775
       2 |  16.58913
---------+----------
   Total |  20.81628
--------------------

. 
. sdtest time1, by (gage)

Variance ratio test
------------------------------------------------------------------------------
   Group |     Obs        Mean    Std. Err.   Std. Dev.   [95% Conf. Interval]
---------+--------------------------------------------------------------------
       1 |      40     25.6775      3.4284    21.68311    18.74291    32.61209
       2 |      46    16.58913    2.252072     15.2743    12.05322    21.12504
---------+--------------------------------------------------------------------
combined |      86    20.81628    2.046051     18.9743    16.74818    24.88438
------------------------------------------------------------------------------
    ratio = sd(1) / sd(2)                                         f =   2.0152
Ho: ratio = 1                                    degrees of freedom =   39, 45

    Ha: ratio < 1               Ha: ratio != 1                 Ha: ratio > 1
  Pr(F < f) = 0.9879         2*Pr(F > f) = 0.0241           Pr(F > f) = 0.0121

. 
. oneway time1 gage

                        Analysis of Variance
    Source              SS         df      MS            F     Prob > F
------------------------------------------------------------------------
Between groups      1767.22289      1   1767.22289      5.15     0.0258
 Within groups      28834.8143     84   343.271599
------------------------------------------------------------------------
    Total           30602.0372     85   360.023967

Bartlett's test for equal variances:  chi2(1) =   5.0503  Prob>chi2 = 0.025

. 
. tabstat time1, stat (mean) by (gender)

Summary for variables: time1
     by categories of: gender (gender)

  gender |      mean
---------+----------
       1 |  18.59583
       2 |  23.62105
---------+----------
   Total |  20.81628
--------------------

. 
. sdtest time1, by (gender)

Variance ratio test
------------------------------------------------------------------------------
   Group |     Obs        Mean    Std. Err.   Std. Dev.   [95% Conf. Interval]
---------+--------------------------------------------------------------------
       1 |      48    18.59583    2.230296    15.45194    14.10906    23.08261
       2 |      38    23.62105    3.661009    22.56798    16.20314    31.03896
---------+--------------------------------------------------------------------
combined |      86    20.81628    2.046051     18.9743    16.74818    24.88438
------------------------------------------------------------------------------
    ratio = sd(1) / sd(2)                                         f =   0.4688
Ho: ratio = 1                                    degrees of freedom =   47, 37

    Ha: ratio < 1               Ha: ratio != 1                 Ha: ratio > 1
  Pr(F < f) = 0.0073         2*Pr(F < f) = 0.0146           Pr(F > f) = 0.9927

. 
. oneway time1 gender

                        Analysis of Variance
    Source              SS         df      MS            F     Prob > F
------------------------------------------------------------------------
Between groups      535.594885      1   535.594885      1.50     0.2247
 Within groups      30066.4423     84   357.933837
------------------------------------------------------------------------
    Total           30602.0372     85   360.023967

Bartlett's test for equal variances:  chi2(1) =   5.9071  Prob>chi2 = 0.015

. 
. tabstat time1, stat (mean) by (gplt)

Summary for variables: time1
     by categories of: gplt 

    gplt |      mean
---------+----------
       1 |  18.91094
       2 |  26.35909
---------+----------
   Total |  20.81628
--------------------

. 
. sdtest time1, by (gplt)

Variance ratio test
------------------------------------------------------------------------------
   Group |     Obs        Mean    Std. Err.   Std. Dev.   [95% Conf. Interval]
---------+--------------------------------------------------------------------
       1 |      64    18.91094    2.330133    18.64106    14.25454    23.56734
       2 |      22    26.35909    4.109427    19.27492    17.81307    34.90511
---------+--------------------------------------------------------------------
combined |      86    20.81628    2.046051     18.9743    16.74818    24.88438
------------------------------------------------------------------------------
    ratio = sd(1) / sd(2)                                         f =   0.9353
Ho: ratio = 1                                    degrees of freedom =   63, 21

    Ha: ratio < 1               Ha: ratio != 1                 Ha: ratio > 1
  Pr(F < f) = 0.4024         2*Pr(F < f) = 0.8049           Pr(F > f) = 0.5976

. 
. oneway time1 gplt

                        Analysis of Variance
    Source              SS         df      MS            F     Prob > F
------------------------------------------------------------------------
Between groups      908.241684      1   908.241684      2.57     0.1127
 Within groups      29693.7955     84   353.497566
------------------------------------------------------------------------
    Total           30602.0372     85   360.023967

Bartlett's test for equal variances:  chi2(1) =   0.0350  Prob>chi2 = 0.852

. 
. tabstat time1, stat (mean) by (gpdw)

Summary for variables: time1
     by categories of: gpdw 

    gpdw |      mean
---------+----------
       1 |  20.12813
       2 |  22.81818
---------+----------
   Total |  20.81628
--------------------

. 
. sdtest time1, by (gpdw)

Variance ratio test
------------------------------------------------------------------------------
   Group |     Obs        Mean    Std. Err.   Std. Dev.   [95% Conf. Interval]
---------+--------------------------------------------------------------------
       1 |      64    20.12813    2.139447    17.11558    15.85278    24.40347
       2 |      22    22.81818    5.102447     23.9326    12.20706     33.4293
---------+--------------------------------------------------------------------
combined |      86    20.81628    2.046051     18.9743    16.74818    24.88438
------------------------------------------------------------------------------
    ratio = sd(1) / sd(2)                                         f =   0.5115
Ho: ratio = 1                                    degrees of freedom =   63, 21

    Ha: ratio < 1               Ha: ratio != 1                 Ha: ratio > 1
  Pr(F < f) = 0.0215         2*Pr(F < f) = 0.0431           Pr(F > f) = 0.9785

. 
. oneway time1 gpdw

                        Analysis of Variance
    Source              SS         df      MS            F     Prob > F
------------------------------------------------------------------------
Between groups      118.475107      1   118.475107      0.33     0.5693
 Within groups      30483.5621     84   362.899549
------------------------------------------------------------------------
    Total           30602.0372     85   360.023967

Bartlett's test for equal variances:  chi2(1) =   3.8418  Prob>chi2 = 0.050

. 
. tabstat time1, stat (mean) by (gmpv)

Summary for variables: time1
     by categories of: gmpv 

    gmpv |      mean
---------+----------
       1 |  21.64375
       2 |  18.40909
---------+----------
   Total |  20.81628
--------------------

. 
. sdtest time1, by (gmpv)

Variance ratio test
------------------------------------------------------------------------------
   Group |     Obs        Mean    Std. Err.   Std. Dev.   [95% Conf. Interval]
---------+--------------------------------------------------------------------
       1 |      64    21.64375    2.349072    18.79258     16.9495      26.338
       2 |      22    18.40909    4.208217    19.73829    9.657625    27.16056
---------+--------------------------------------------------------------------
combined |      86    20.81628    2.046051     18.9743    16.74818    24.88438
------------------------------------------------------------------------------
    ratio = sd(1) / sd(2)                                         f =   0.9065
Ho: ratio = 1                                    degrees of freedom =   63, 21

    Ha: ratio < 1               Ha: ratio != 1                 Ha: ratio > 1
  Pr(F < f) = 0.3686         2*Pr(F < f) = 0.7372           Pr(F > f) = 0.6314

. 
. oneway time1 gmpv

                        Analysis of Variance
    Source              SS         df      MS            F     Prob > F
------------------------------------------------------------------------
Between groups      171.301527      1   171.301527      0.47     0.4936
 Within groups      30430.7357     84   362.270663
------------------------------------------------------------------------
    Total           30602.0372     85   360.023967

Bartlett's test for equal variances:  chi2(1) =   0.0759  Prob>chi2 = 0.783

. 
. tabstat time1, stat (mean) by (gplr)

Summary for variables: time1
     by categories of: gplr 

    gplr |      mean
---------+----------
       1 |  20.49697
       2 |     21.87
---------+----------
   Total |  20.81628
--------------------

. 
. sdtest time1, by (gplr)

Variance ratio test
------------------------------------------------------------------------------
   Group |     Obs        Mean    Std. Err.   Std. Dev.   [95% Conf. Interval]
---------+--------------------------------------------------------------------
       1 |      66    20.49697     2.12414     17.2566    16.25477    24.73917
       2 |      20       21.87    5.433023    24.29722    10.49855    33.24145
---------+--------------------------------------------------------------------
combined |      86    20.81628    2.046051     18.9743    16.74818    24.88438
------------------------------------------------------------------------------
    ratio = sd(1) / sd(2)                                         f =   0.5044
Ho: ratio = 1                                    degrees of freedom =   65, 19

    Ha: ratio < 1               Ha: ratio != 1                 Ha: ratio > 1
  Pr(F < f) = 0.0219         2*Pr(F < f) = 0.0437           Pr(F > f) = 0.9781

. 
. oneway time1 gplr

                        Analysis of Variance
    Source              SS         df      MS            F     Prob > F
------------------------------------------------------------------------
Between groups      28.9358154      1   28.9358154      0.08     0.7787
 Within groups      30573.1014     84   363.965493
------------------------------------------------------------------------
    Total           30602.0372     85   360.023967

Bartlett's test for equal variances:  chi2(1) =   3.7832  Prob>chi2 = 0.052

. 
. tabstat time1, stat (mean) by (gnlr)

Summary for variables: time1
     by categories of: gnlr 

    gnlr |      mean
---------+----------
       1 |  22.79231
       2 |      14.7
---------+----------
   Total |  20.81628
--------------------

. 
. sdtest time1, by (gnlr)

Variance ratio test
------------------------------------------------------------------------------
   Group |     Obs        Mean    Std. Err.   Std. Dev.   [95% Conf. Interval]
---------+--------------------------------------------------------------------
       1 |      65    22.79231    2.416558    19.48291    17.96468    27.61994
       2 |      21        14.7     3.54202    16.23157    7.311476    22.08852
---------+--------------------------------------------------------------------
combined |      86    20.81628    2.046051     18.9743    16.74818    24.88438
------------------------------------------------------------------------------
    ratio = sd(1) / sd(2)                                         f =   1.4407
Ho: ratio = 1                                    degrees of freedom =   64, 20

    Ha: ratio < 1               Ha: ratio != 1                 Ha: ratio > 1
  Pr(F < f) = 0.8172         2*Pr(F > f) = 0.3655           Pr(F > f) = 0.1828

. 
. oneway time1 gnlr

                        Analysis of Variance
    Source              SS         df      MS            F     Prob > F
------------------------------------------------------------------------
Between groups      1039.39106      1   1039.39106      2.95     0.0894
 Within groups      29562.6462     84   351.936264
------------------------------------------------------------------------
    Total           30602.0372     85   360.023967

Bartlett's test for equal variances:  chi2(1) =   0.9339  Prob>chi2 = 0.334

. 
. tabstat time1, stat (mean) by (glym)

Summary for variables: time1
     by categories of: glym 

    glym |      mean
---------+----------
       1 |  19.11563
       2 |  25.76364
---------+----------
   Total |  20.81628
--------------------

. 
. sdtest time1, by (glym)

Variance ratio test
------------------------------------------------------------------------------
   Group |     Obs        Mean    Std. Err.   Std. Dev.   [95% Conf. Interval]
---------+--------------------------------------------------------------------
       1 |      64    19.11563    2.494421    19.95536    14.13092    24.10033
       2 |      22    25.76364    3.220205     15.1041    19.06685    32.46042
---------+--------------------------------------------------------------------
combined |      86    20.81628    2.046051     18.9743    16.74818    24.88438
------------------------------------------------------------------------------
    ratio = sd(1) / sd(2)                                         f =   1.7455
Ho: ratio = 1                                    degrees of freedom =   63, 21

    Ha: ratio < 1               Ha: ratio != 1                 Ha: ratio > 1
  Pr(F < f) = 0.9219         2*Pr(F > f) = 0.1562           Pr(F > f) = 0.0781

. 
. oneway time1 glym

                        Analysis of Variance
    Source              SS         df      MS            F     Prob > F
------------------------------------------------------------------------
Between groups      723.581925      1   723.581925      2.03     0.1575
 Within groups      29878.4553     84   355.695896
------------------------------------------------------------------------
    Total           30602.0372     85   360.023967

Bartlett's test for equal variances:  chi2(1) =   2.1757  Prob>chi2 = 0.140

. 
. tabstat time1, stat (mean) by (gneu)

Summary for variables: time1
     by categories of: gneu 

    gneu |      mean
---------+----------
       1 |   21.3125
       2 |  19.37273
---------+----------
   Total |  20.81628
--------------------

. 
. sdtest time1, by (gneu)

Variance ratio test
------------------------------------------------------------------------------
   Group |     Obs        Mean    Std. Err.   Std. Dev.   [95% Conf. Interval]
---------+--------------------------------------------------------------------
       1 |      64     21.3125    2.407047    19.25638     16.5024     26.1226
       2 |      22    19.37273    3.942093    18.49005     11.1747    27.57076
---------+--------------------------------------------------------------------
combined |      86    20.81628    2.046051     18.9743    16.74818    24.88438
------------------------------------------------------------------------------
    ratio = sd(1) / sd(2)                                         f =   1.0846
Ho: ratio = 1                                    degrees of freedom =   63, 21

    Ha: ratio < 1               Ha: ratio != 1                 Ha: ratio > 1
  Pr(F < f) = 0.5656         2*Pr(F > f) = 0.8688           Pr(F > f) = 0.4344

. 
. oneway time1 gneu

                        Analysis of Variance
    Source              SS         df      MS            F     Prob > F
------------------------------------------------------------------------
Between groups      61.6035729      1   61.6035729      0.17     0.6817
 Within groups      30540.4336     84   363.576591
------------------------------------------------------------------------
    Total           30602.0372     85   360.023967

Bartlett's test for equal variances:  chi2(1) =   0.0504  Prob>chi2 = 0.822

. 
. tabstat time1, stat (mean) by (gaptt)

Summary for variables: time1
     by categories of: gaptt 

   gaptt |      mean
---------+----------
       1 |  20.36875
       2 |  22.11818
---------+----------
   Total |  20.81628
--------------------

. 
. sdtest time1, by (gaptt)

Variance ratio test
------------------------------------------------------------------------------
   Group |     Obs        Mean    Std. Err.   Std. Dev.   [95% Conf. Interval]
---------+--------------------------------------------------------------------
       1 |      64    20.36875    2.271356    18.17085    15.82981    24.90769
       2 |      22    22.11818    4.594042    21.54797    12.56435    31.67202
---------+--------------------------------------------------------------------
combined |      86    20.81628    2.046051     18.9743    16.74818    24.88438
------------------------------------------------------------------------------
    ratio = sd(1) / sd(2)                                         f =   0.7111
Ho: ratio = 1                                    degrees of freedom =   63, 21

    Ha: ratio < 1               Ha: ratio != 1                 Ha: ratio > 1
  Pr(F < f) = 0.1502         2*Pr(F < f) = 0.3004           Pr(F > f) = 0.8498

. 
. oneway time1 gaptt

                        Analysis of Variance
    Source              SS         df      MS            F     Prob > F
------------------------------------------------------------------------
Between groups       50.106982      1    50.106982      0.14     0.7114
 Within groups      30551.9302     84   363.713455
------------------------------------------------------------------------
    Total           30602.0372     85   360.023967

Bartlett's test for equal variances:  chi2(1) =   0.9495  Prob>chi2 = 0.330

. 
. tabstat time1, stat (mean) by (gpt)

Summary for variables: time1
     by categories of: gpt 

     gpt |      mean
---------+----------
       1 |  23.02969
       2 |  14.37727
---------+----------
   Total |  20.81628
--------------------

. 
. sdtest time1, by (gpt)

Variance ratio test
------------------------------------------------------------------------------
   Group |     Obs        Mean    Std. Err.   Std. Dev.   [95% Conf. Interval]
---------+--------------------------------------------------------------------
       1 |      64    23.02969    2.537625      20.301    17.95865    28.10073
       2 |      22    14.37727    2.717635    12.74684    8.725642     20.0289
---------+--------------------------------------------------------------------
combined |      86    20.81628    2.046051     18.9743    16.74818    24.88438
------------------------------------------------------------------------------
    ratio = sd(1) / sd(2)                                         f =   2.5365
Ho: ratio = 1                                    degrees of freedom =   63, 21

    Ha: ratio < 1               Ha: ratio != 1                 Ha: ratio > 1
  Pr(F < f) = 0.9899         2*Pr(F > f) = 0.0202           Pr(F > f) = 0.0101

. 
. oneway time1 gpt

                        Analysis of Variance
    Source              SS         df      MS            F     Prob > F
------------------------------------------------------------------------
Between groups      1225.68498      1   1225.68498      3.50     0.0647
 Within groups      29376.3522     84   349.718479
------------------------------------------------------------------------
    Total           30602.0372     85   360.023967

Bartlett's test for equal variances:  chi2(1) =   5.6552  Prob>chi2 = 0.017

. 
. tabstat time1, stat (mean) by (gtt)

Summary for variables: time1
     by categories of: gtt 

     gtt |      mean
---------+----------
       1 |  20.74918
       2 |     20.98
---------+----------
   Total |  20.81628
--------------------

. 
. sdtest time1, by (gtt)

Variance ratio test
------------------------------------------------------------------------------
   Group |     Obs        Mean    Std. Err.   Std. Dev.   [95% Conf. Interval]
---------+--------------------------------------------------------------------
       1 |      61    20.74918    2.462078    19.22944    15.82429    25.67407
       2 |      25       20.98    3.744952    18.72476     13.2508     28.7092
---------+--------------------------------------------------------------------
combined |      86    20.81628    2.046051     18.9743    16.74818    24.88438
------------------------------------------------------------------------------
    ratio = sd(1) / sd(2)                                         f =   1.0546
Ho: ratio = 1                                    degrees of freedom =   60, 24

    Ha: ratio < 1               Ha: ratio != 1                 Ha: ratio > 1
  Pr(F < f) = 0.5419         2*Pr(F > f) = 0.9163           Pr(F > f) = 0.4581

. 
. oneway time1 gtt

                        Analysis of Variance
    Source              SS         df      MS            F     Prob > F
------------------------------------------------------------------------
Between groups      .944750286      1   .944750286      0.00     0.9595
 Within groups      30601.0925     84    364.29872
------------------------------------------------------------------------
    Total           30602.0372     85   360.023967

Bartlett's test for equal variances:  chi2(1) =   0.0237  Prob>chi2 = 0.878

. 
. tabstat time1, stat (mean) by (gfib)

Summary for variables: time1
     by categories of: gfib 

    gfib |      mean
---------+----------
       1 |  22.01846
       2 |  17.09524
---------+----------
   Total |  20.81628
--------------------

. 
. sdtest time1, by (gfib)

Variance ratio test
------------------------------------------------------------------------------
   Group |     Obs        Mean    Std. Err.   Std. Dev.   [95% Conf. Interval]
---------+--------------------------------------------------------------------
       1 |      65    22.01846    2.620697    21.12873    16.78302    27.25391
       2 |      21    17.09524    1.979796    9.072567    12.96546    21.22502
---------+--------------------------------------------------------------------
combined |      86    20.81628    2.046051     18.9743    16.74818    24.88438
------------------------------------------------------------------------------
    ratio = sd(1) / sd(2)                                         f =   5.4236
Ho: ratio = 1                                    degrees of freedom =   64, 20

    Ha: ratio < 1               Ha: ratio != 1                 Ha: ratio > 1
  Pr(F < f) = 0.9999         2*Pr(F > f) = 0.0001           Pr(F > f) = 0.0001

. 
. oneway time1 gfib

                        Analysis of Variance
    Source              SS         df      MS            F     Prob > F
------------------------------------------------------------------------
Between groups      384.709839      1   384.709839      1.07     0.3040
 Within groups      30217.3274     84   359.730088
------------------------------------------------------------------------
    Total           30602.0372     85   360.023967

Bartlett's test for equal variances:  chi2(1) =  15.4026  Prob>chi2 = 0.000

. 
. tabstat time1, stat (mean) by (gdd)

Summary for variables: time1
     by categories of: gdd 

     gdd |      mean
---------+----------
       1 |     22.05
       2 |  17.62917
---------+----------
   Total |  20.81628
--------------------

. 
. sdtest time1, by (gdd)

Variance ratio test
------------------------------------------------------------------------------
   Group |     Obs        Mean    Std. Err.   Std. Dev.   [95% Conf. Interval]
---------+--------------------------------------------------------------------
       1 |      62       22.05    2.318321    18.25447    17.41423    26.68577
       2 |      24    17.62917    4.242878    20.78577    8.852106    26.40623
---------+--------------------------------------------------------------------
combined |      86    20.81628    2.046051     18.9743    16.74818    24.88438
------------------------------------------------------------------------------
    ratio = sd(1) / sd(2)                                         f =   0.7713
Ho: ratio = 1                                    degrees of freedom =   61, 23

    Ha: ratio < 1               Ha: ratio != 1                 Ha: ratio > 1
  Pr(F < f) = 0.2084         2*Pr(F < f) = 0.4168           Pr(F > f) = 0.7916

. 
. oneway time1 gdd

                        Analysis of Variance
    Source              SS         df      MS            F     Prob > F
------------------------------------------------------------------------
Between groups      338.152626      1   338.152626      0.94     0.3354
 Within groups      30263.8846     84    360.28434
------------------------------------------------------------------------
    Total           30602.0372     85   360.023967

Bartlett's test for equal variances:  chi2(1) =   0.5755  Prob>chi2 = 0.448

. ranksum time1, by (gcea)

Two-sample Wilcoxon rank-sum (Mann-Whitney) test

        gcea |      obs    rank sum    expected
-------------+---------------------------------
           1 |       57        2526      2479.5
           2 |       29        1215      1261.5
-------------+---------------------------------
    combined |       86        3741        3741

unadjusted variance    11984.25
adjustment for ties       -4.86
                     ----------
adjusted variance      11979.39

Ho: time1(gcea==1) = time1(gcea==2)
             z =   0.425
    Prob > |z| =   0.6709

. ranksum time1, by (galb)

Two-sample Wilcoxon rank-sum (Mann-Whitney) test

        galb |      obs    rank sum    expected
-------------+---------------------------------
           1 |       38      1446.5        1653
           2 |       48      2294.5        2088
-------------+---------------------------------
    combined |       86        3741        3741

unadjusted variance    13224.00
adjustment for ties       -5.36
                     ----------
adjusted variance      13218.64

Ho: time1(galb==1) = time1(galb==2)
             z =  -1.796
    Prob > |z| =   0.0725

. ranksum time1, by (gcrp)

Two-sample Wilcoxon rank-sum (Mann-Whitney) test

        gcrp |      obs    rank sum    expected
-------------+---------------------------------
           1 |       25        1294      1087.5
           2 |       61        2447      2653.5
-------------+---------------------------------
    combined |       86        3741        3741

unadjusted variance    11056.25
adjustment for ties       -4.49
                     ----------
adjusted variance      11051.76

Ho: time1(gcrp==1) = time1(gcrp==2)
             z =   1.964
    Prob > |z| =   0.0495

. ranksum time1, by (GPS)

Two-sample Wilcoxon rank-sum (Mann-Whitney) test

         GPS |      obs    rank sum    expected
-------------+---------------------------------
           0 |       19      1002.5       826.5
           1 |       67      2738.5      2914.5
-------------+---------------------------------
    combined |       86        3741        3741

unadjusted variance     9229.25
adjustment for ties       -3.74
                     ----------
adjusted variance       9225.51

Ho: time1(GPS==0) = time1(GPS==1)
             z =   1.832
    Prob > |z| =   0.0669

. ranksum time1, by (gplr)

Two-sample Wilcoxon rank-sum (Mann-Whitney) test

        gplr |      obs    rank sum    expected
-------------+---------------------------------
           1 |       66        2888        2871
           2 |       20         853         870
-------------+---------------------------------
    combined |       86        3741        3741

unadjusted variance     9570.00
adjustment for ties       -3.88
                     ----------
adjusted variance       9566.12

Ho: time1(gplr==1) = time1(gplr==2)
             z =   0.174
    Prob > |z| =   0.8620

. ranksum time1, by (gpdw)

Two-sample Wilcoxon rank-sum (Mann-Whitney) test

        gpdw |      obs    rank sum    expected
-------------+---------------------------------
           1 |       64        2809        2784
           2 |       22         932         957
-------------+---------------------------------
    combined |       86        3741        3741

unadjusted variance    10208.00
adjustment for ties       -4.14
                     ----------
adjusted variance      10203.86

Ho: time1(gpdw==1) = time1(gpdw==2)
             z =   0.247
    Prob > |z| =   0.8045

. tabstat time2, stat (mean) by (gca199)

Summary for variables: time2
     by categories of: gca199 

  gca199 |      mean
---------+----------
       1 |  17.33214
       2 |  14.39828
---------+----------
   Total |  15.35349
--------------------

. 
. sdtest time2, by (gca199)

Variance ratio test
------------------------------------------------------------------------------
   Group |     Obs        Mean    Std. Err.   Std. Dev.   [95% Conf. Interval]
---------+--------------------------------------------------------------------
       1 |      28    17.33214    4.107774     21.7363    8.903686     25.7606
       2 |      58    14.39828    2.347485    17.87791    9.697518    19.09903
---------+--------------------------------------------------------------------
combined |      86    15.35349    2.063873    19.13957    11.24996    19.45702
------------------------------------------------------------------------------
    ratio = sd(1) / sd(2)                                         f =   1.4782
Ho: ratio = 1                                    degrees of freedom =   27, 57

    Ha: ratio < 1               Ha: ratio != 1                 Ha: ratio > 1
  Pr(F < f) = 0.8924         2*Pr(F > f) = 0.2152           Pr(F > f) = 0.1076

. 
. oneway time2 gca199

                        Analysis of Variance
    Source              SS         df      MS            F     Prob > F
------------------------------------------------------------------------
Between groups      162.543054      1   162.543054      0.44     0.5086
 Within groups      30974.9309     84   368.749177
------------------------------------------------------------------------
    Total            31137.474     85   366.323223

Bartlett's test for equal variances:  chi2(1) =   1.4377  Prob>chi2 = 0.231

. 
. tabstat time2, stat (mean) by (gca125)

Summary for variables: time2
     by categories of: gca125 

  gca125 |      mean
---------+----------
       1 |  15.08983
       2 |  15.92963
---------+----------
   Total |  15.35349
--------------------

. 
. sdtest time2, by (gca125)

Variance ratio test
------------------------------------------------------------------------------
   Group |     Obs        Mean    Std. Err.   Std. Dev.   [95% Conf. Interval]
---------+--------------------------------------------------------------------
       1 |      59    15.08983    2.628065    20.18655    9.829187    20.35047
       2 |      27    15.92963    3.266334    16.97237    9.215583    22.64368
---------+--------------------------------------------------------------------
combined |      86    15.35349    2.063873    19.13957    11.24996    19.45702
------------------------------------------------------------------------------
    ratio = sd(1) / sd(2)                                         f =   1.4146
Ho: ratio = 1                                    degrees of freedom =   58, 26

    Ha: ratio < 1               Ha: ratio != 1                 Ha: ratio > 1
  Pr(F < f) = 0.8329         2*Pr(F > f) = 0.3341           Pr(F > f) = 0.1671

. 
. oneway time2 gca125

                        Analysis of Variance
    Source              SS         df      MS            F     Prob > F
------------------------------------------------------------------------
Between groups      13.0637589      1   13.0637589      0.04     0.8515
 Within groups      31124.4102     84   370.528693
------------------------------------------------------------------------
    Total            31137.474     85   366.323223

Bartlett's test for equal variances:  chi2(1) =   1.0149  Prob>chi2 = 0.314

. 
. tabstat time2, stat (mean) by (gcea)

Summary for variables: time2
     by categories of: gcea 

    gcea |      mean
---------+----------
       1 |  16.26842
       2 |  13.55517
---------+----------
   Total |  15.35349
--------------------

. 
. sdtest time2, by (gcea)

Variance ratio test
------------------------------------------------------------------------------
   Group |     Obs        Mean    Std. Err.   Std. Dev.   [95% Conf. Interval]
---------+--------------------------------------------------------------------
       1 |      57    16.26842    2.841853    21.45552    10.57551    21.96134
       2 |      29    13.55517    2.534727    13.64992    8.363019    18.74733
---------+--------------------------------------------------------------------
combined |      86    15.35349    2.063873    19.13957    11.24996    19.45702
------------------------------------------------------------------------------
    ratio = sd(1) / sd(2)                                         f =   2.4707
Ho: ratio = 1                                    degrees of freedom =   56, 28

    Ha: ratio < 1               Ha: ratio != 1                 Ha: ratio > 1
  Pr(F < f) = 0.9945         2*Pr(F > f) = 0.0109           Pr(F > f) = 0.0055

. 
. oneway time2 gcea

                        Analysis of Variance
    Source              SS         df      MS            F     Prob > F
------------------------------------------------------------------------
Between groups      141.499071      1   141.499071      0.38     0.5374
 Within groups      30995.9749     84   368.999701
------------------------------------------------------------------------
    Total            31137.474     85   366.323223

Bartlett's test for equal variances:  chi2(1) =   6.6553  Prob>chi2 = 0.010

. 
. tabstat time2, stat (mean) by (galb)

Summary for variables: time2
     by categories of: galb 

    galb |      mean
---------+----------
       1 |      9.65
       2 |  19.86875
---------+----------
   Total |  15.35349
--------------------

. 
. sdtest time2, by (galb)

Variance ratio test
------------------------------------------------------------------------------
   Group |     Obs        Mean    Std. Err.   Std. Dev.   [95% Conf. Interval]
---------+--------------------------------------------------------------------
       1 |      38        9.65    1.712944     10.5593    6.179245    13.12076
       2 |      48    19.86875    3.315374    22.96958    13.19908    26.53842
---------+--------------------------------------------------------------------
combined |      86    15.35349    2.063873    19.13957    11.24996    19.45702
------------------------------------------------------------------------------
    ratio = sd(1) / sd(2)                                         f =   0.2113
Ho: ratio = 1                                    degrees of freedom =   37, 47

    Ha: ratio < 1               Ha: ratio != 1                 Ha: ratio > 1
  Pr(F < f) = 0.0000         2*Pr(F < f) = 0.0000           Pr(F > f) = 1.0000

. 
. oneway time2 galb

                        Analysis of Variance
    Source              SS         df      MS            F     Prob > F
------------------------------------------------------------------------
Between groups      2214.73583      1   2214.73583      6.43     0.0131
 Within groups      28922.7381     84   344.318311
------------------------------------------------------------------------
    Total            31137.474     85   366.323223

Bartlett's test for equal variances:  chi2(1) =  21.4014  Prob>chi2 = 0.000

. 
. tabstat time2, stat (mean) by (gcrp)

Summary for variables: time2
     by categories of: gcrp 

    gcrp |      mean
---------+----------
       1 |    16.964
       2 |  14.69344
---------+----------
   Total |  15.35349
--------------------

. 
. sdtest time2, by (gcrp)

Variance ratio test
------------------------------------------------------------------------------
   Group |     Obs        Mean    Std. Err.   Std. Dev.   [95% Conf. Interval]
---------+--------------------------------------------------------------------
       1 |      25      16.964    2.473842    12.36921    11.85824    22.06976
       2 |      61    14.69344    2.734825    21.35967    9.222978    20.16391
---------+--------------------------------------------------------------------
combined |      86    15.35349    2.063873    19.13957    11.24996    19.45702
------------------------------------------------------------------------------
    ratio = sd(1) / sd(2)                                         f =   0.3353
Ho: ratio = 1                                    degrees of freedom =   24, 60

    Ha: ratio < 1               Ha: ratio != 1                 Ha: ratio > 1
  Pr(F < f) = 0.0022         2*Pr(F < f) = 0.0043           Pr(F > f) = 0.9978

. 
. oneway time2 gcrp

                        Analysis of Variance
    Source              SS         df      MS            F     Prob > F
------------------------------------------------------------------------
Between groups      91.4189764      1   91.4189764      0.25     0.6202
 Within groups       31046.055     84   369.595893
------------------------------------------------------------------------
    Total            31137.474     85   366.323223

Bartlett's test for equal variances:  chi2(1) =   8.4018  Prob>chi2 = 0.004

. 
. tabstat time2, stat (mean) by (GPS)

Summary for variables: time2
     by categories of: GPS (GPS)

     GPS |      mean
---------+----------
       0 |  17.11579
       1 |  14.85373
---------+----------
   Total |  15.35349
--------------------

. 
. sdtest time2, by (GPS)

Variance ratio test
------------------------------------------------------------------------------
   Group |     Obs        Mean    Std. Err.   Std. Dev.   [95% Conf. Interval]
---------+--------------------------------------------------------------------
       0 |      19    17.11579    2.436435    10.62017    11.99703    22.23455
       1 |      67    14.85373    2.562275    20.97312    9.737985    19.96948
---------+--------------------------------------------------------------------
combined |      86    15.35349    2.063873    19.13957    11.24996    19.45702
------------------------------------------------------------------------------
    ratio = sd(0) / sd(1)                                         f =   0.2564
Ho: ratio = 1                                    degrees of freedom =   18, 66

    Ha: ratio < 1               Ha: ratio != 1                 Ha: ratio > 1
  Pr(F < f) = 0.0011         2*Pr(F < f) = 0.0022           Pr(F > f) = 0.9989

. 
. oneway time2 GPS

                        Analysis of Variance
    Source              SS         df      MS            F     Prob > F
------------------------------------------------------------------------
Between groups      75.7421232      1   75.7421232      0.20     0.6520
 Within groups      31061.7318     84   369.782522
------------------------------------------------------------------------
    Total            31137.474     85   366.323223

Bartlett's test for equal variances:  chi2(1) =   9.7271  Prob>chi2 = 0.002

. 
. tabstat time2, stat (mean) by (GPS)

Summary for variables: time2
     by categories of: GPS (GPS)

     GPS |      mean
---------+----------
       0 |  17.11579
       1 |  14.85373
---------+----------
   Total |  15.35349
--------------------

. 
. sdtest time2, by (GPS)

Variance ratio test
------------------------------------------------------------------------------
   Group |     Obs        Mean    Std. Err.   Std. Dev.   [95% Conf. Interval]
---------+--------------------------------------------------------------------
       0 |      19    17.11579    2.436435    10.62017    11.99703    22.23455
       1 |      67    14.85373    2.562275    20.97312    9.737985    19.96948
---------+--------------------------------------------------------------------
combined |      86    15.35349    2.063873    19.13957    11.24996    19.45702
------------------------------------------------------------------------------
    ratio = sd(0) / sd(1)                                         f =   0.2564
Ho: ratio = 1                                    degrees of freedom =   18, 66

    Ha: ratio < 1               Ha: ratio != 1                 Ha: ratio > 1
  Pr(F < f) = 0.0011         2*Pr(F < f) = 0.0022           Pr(F > f) = 0.9989

. 
. oneway time2 GPS

                        Analysis of Variance
    Source              SS         df      MS            F     Prob > F
------------------------------------------------------------------------
Between groups      75.7421232      1   75.7421232      0.20     0.6520
 Within groups      31061.7318     84   369.782522
------------------------------------------------------------------------
    Total            31137.474     85   366.323223

Bartlett's test for equal variances:  chi2(1) =   9.7271  Prob>chi2 = 0.002

. 
. tabstat time2, stat (mean) by (gage)

Summary for variables: time2
     by categories of: gage 

    gage |      mean
---------+----------
       1 |   19.6875
       2 |  11.58478
---------+----------
   Total |  15.35349
--------------------

. 
. sdtest time2, by (gage)

Variance ratio test
------------------------------------------------------------------------------
   Group |     Obs        Mean    Std. Err.   Std. Dev.   [95% Conf. Interval]
---------+--------------------------------------------------------------------
       1 |      40     19.6875    3.463808    21.90704    12.68129    26.69371
       2 |      46    11.58478    2.306885    15.64606    6.938477    16.23109
---------+--------------------------------------------------------------------
combined |      86    15.35349    2.063873    19.13957    11.24996    19.45702
------------------------------------------------------------------------------
    ratio = sd(1) / sd(2)                                         f =   1.9605
Ho: ratio = 1                                    degrees of freedom =   39, 45

    Ha: ratio < 1               Ha: ratio != 1                 Ha: ratio > 1
  Pr(F < f) = 0.9849         2*Pr(F > f) = 0.0302           Pr(F > f) = 0.0151

. 
. oneway time2 gage

                        Analysis of Variance
    Source              SS         df      MS            F     Prob > F
------------------------------------------------------------------------
Between groups      1404.69086      1   1404.69086      3.97     0.0496
 Within groups      29732.7831     84   353.961704
------------------------------------------------------------------------
    Total            31137.474     85   366.323223

Bartlett's test for equal variances:  chi2(1) =   4.6652  Prob>chi2 = 0.031

. 
. tabstat time2, stat (mean) by (gender)

Summary for variables: time2
     by categories of: gender (gender)

  gender |      mean
---------+----------
       1 |  13.19792
       2 |  18.07632
---------+----------
   Total |  15.35349
--------------------

. 
. sdtest time2, by (gender)

Variance ratio test
------------------------------------------------------------------------------
   Group |     Obs        Mean    Std. Err.   Std. Dev.   [95% Conf. Interval]
---------+--------------------------------------------------------------------
       1 |      48    13.19792    2.173136    15.05593     8.82613     17.5697
       2 |      38    18.07632    3.769563    23.23715    10.43845    25.71418
---------+--------------------------------------------------------------------
combined |      86    15.35349    2.063873    19.13957    11.24996    19.45702
------------------------------------------------------------------------------
    ratio = sd(1) / sd(2)                                         f =   0.4198
Ho: ratio = 1                                    degrees of freedom =   47, 37

    Ha: ratio < 1               Ha: ratio != 1                 Ha: ratio > 1
  Pr(F < f) = 0.0026         2*Pr(F < f) = 0.0052           Pr(F > f) = 0.9974

. 
. oneway time2 gender

                        Analysis of Variance
    Source              SS         df      MS            F     Prob > F
------------------------------------------------------------------------
Between groups      504.755478      1   504.755478      1.38     0.2427
 Within groups      30632.7185     84    364.67522
------------------------------------------------------------------------
    Total            31137.474     85   366.323223

Bartlett's test for equal variances:  chi2(1) =   7.7306  Prob>chi2 = 0.005

. 
. tabstat time2, stat (mean) by (gplt)

Summary for variables: time2
     by categories of: gplt 

    gplt |      mean
---------+----------
       1 |  13.97031
       2 |  19.37727
---------+----------
   Total |  15.35349
--------------------

. 
. sdtest time2, by (gplt)

Variance ratio test
------------------------------------------------------------------------------
   Group |     Obs        Mean    Std. Err.   Std. Dev.   [95% Conf. Interval]
---------+--------------------------------------------------------------------
       1 |      64    13.97031     2.35028    18.80224    9.273652    18.66697
       2 |      22    19.37727    4.260662    19.98428    10.51674    28.23781
---------+--------------------------------------------------------------------
combined |      86    15.35349    2.063873    19.13957    11.24996    19.45702
------------------------------------------------------------------------------
    ratio = sd(1) / sd(2)                                         f =   0.8852
Ho: ratio = 1                                    degrees of freedom =   63, 21

    Ha: ratio < 1               Ha: ratio != 1                 Ha: ratio > 1
  Pr(F < f) = 0.3435         2*Pr(F < f) = 0.6870           Pr(F > f) = 0.6565

. 
. oneway time2 gplt

                        Analysis of Variance
    Source              SS         df      MS            F     Prob > F
------------------------------------------------------------------------
Between groups      478.641723      1   478.641723      1.31     0.2554
 Within groups      30658.8322     84   364.986098
------------------------------------------------------------------------
    Total            31137.474     85   366.323223

Bartlett's test for equal variances:  chi2(1) =   0.1174  Prob>chi2 = 0.732

. 
. tabstat time2, stat (mean) by (gpdw)

Summary for variables: time2
     by categories of: gpdw 

    gpdw |      mean
---------+----------
       1 |  14.75938
       2 |  17.08182
---------+----------
   Total |  15.35349
--------------------

. 
. sdtest time2, by (gpdw)

Variance ratio test
------------------------------------------------------------------------------
   Group |     Obs        Mean    Std. Err.   Std. Dev.   [95% Conf. Interval]
---------+--------------------------------------------------------------------
       1 |      64    14.75938    2.170947    17.36757    10.42108    19.09767
       2 |      22    17.08182    5.106297    23.95066    6.462692    27.70094
---------+--------------------------------------------------------------------
combined |      86    15.35349    2.063873    19.13957    11.24996    19.45702
------------------------------------------------------------------------------
    ratio = sd(1) / sd(2)                                         f =   0.5258
Ho: ratio = 1                                    degrees of freedom =   63, 21

    Ha: ratio < 1               Ha: ratio != 1                 Ha: ratio > 1
  Pr(F < f) = 0.0263         2*Pr(F < f) = 0.0526           Pr(F > f) = 0.9737

. 
. oneway time2 gpdw

                        Analysis of Variance
    Source              SS         df      MS            F     Prob > F
------------------------------------------------------------------------
Between groups      88.3068512      1   88.3068512      0.24     0.6263
 Within groups      31049.1671     84   369.632942
------------------------------------------------------------------------
    Total            31137.474     85   366.323223

Bartlett's test for equal variances:  chi2(1) =   3.5183  Prob>chi2 = 0.061

. 
. tabstat time2, stat (mean) by (gmpv)

Summary for variables: time2
     by categories of: gmpv 

    gmpv |      mean
---------+----------
       1 |  15.57969
       2 |  14.69545
---------+----------
   Total |  15.35349
--------------------

. 
. sdtest time2, by (gmpv)

Variance ratio test
------------------------------------------------------------------------------
   Group |     Obs        Mean    Std. Err.   Std. Dev.   [95% Conf. Interval]
---------+--------------------------------------------------------------------
       1 |      64    15.57969    2.383649    19.06919    10.81635    20.34303
       2 |      22    14.69545    4.216985    19.77941    5.925754    23.46516
---------+--------------------------------------------------------------------
combined |      86    15.35349    2.063873    19.13957    11.24996    19.45702
------------------------------------------------------------------------------
    ratio = sd(1) / sd(2)                                         f =   0.9295
Ho: ratio = 1                                    degrees of freedom =   63, 21

    Ha: ratio < 1               Ha: ratio != 1                 Ha: ratio > 1
  Pr(F < f) = 0.3956         2*Pr(F < f) = 0.7912           Pr(F > f) = 0.6044

. 
. oneway time2 gmpv

                        Analysis of Variance
    Source              SS         df      MS            F     Prob > F
------------------------------------------------------------------------
Between groups      12.8008143      1   12.8008143      0.03     0.8530
 Within groups      31124.6731     84   370.531823
------------------------------------------------------------------------
    Total            31137.474     85   366.323223

Bartlett's test for equal variances:  chi2(1) =   0.0419  Prob>chi2 = 0.838

. 
. tabstat time2, stat (mean) by (gplr)

Summary for variables: time2
     by categories of: gplr 

    gplr |      mean
---------+----------
       1 |  14.91818
       2 |     16.79
---------+----------
   Total |  15.35349
--------------------

. 
. sdtest time2, by (gplr)

Variance ratio test
------------------------------------------------------------------------------
   Group |     Obs        Mean    Std. Err.   Std. Dev.   [95% Conf. Interval]
---------+--------------------------------------------------------------------
       1 |      66    14.91818    2.114847     17.1811    10.69454    19.14182
       2 |      20       16.79     5.59519    25.02245    5.079132    28.50087
---------+--------------------------------------------------------------------
combined |      86    15.35349    2.063873    19.13957    11.24996    19.45702
------------------------------------------------------------------------------
    ratio = sd(1) / sd(2)                                         f =   0.4715
Ho: ratio = 1                                    degrees of freedom =   65, 19

    Ha: ratio < 1               Ha: ratio != 1                 Ha: ratio > 1
  Pr(F < f) = 0.0132         2*Pr(F < f) = 0.0265           Pr(F > f) = 0.9868

. 
. oneway time2 gplr

                        Analysis of Variance
    Source              SS         df      MS            F     Prob > F
------------------------------------------------------------------------
Between groups      53.7777717      1   53.7777717      0.15     0.7040
 Within groups      31083.6962     84   370.044002
------------------------------------------------------------------------
    Total            31137.474     85   366.323223

Bartlett's test for equal variances:  chi2(1) =   4.6113  Prob>chi2 = 0.032

. 
. tabstat time2, stat (mean) by (gnlr)

Summary for variables: time2
     by categories of: gnlr 

    gnlr |      mean
---------+----------
       1 |  16.87231
       2 |  10.65238
---------+----------
   Total |  15.35349
--------------------

. 
. sdtest time2, by (gnlr)

Variance ratio test
------------------------------------------------------------------------------
   Group |     Obs        Mean    Std. Err.   Std. Dev.   [95% Conf. Interval]
---------+--------------------------------------------------------------------
       1 |      65    16.87231    2.438658    19.66109    12.00053    21.74409
       2 |      21    10.65238    3.710889    17.00543    2.911602    18.39316
---------+--------------------------------------------------------------------
combined |      86    15.35349    2.063873    19.13957    11.24996    19.45702
------------------------------------------------------------------------------
    ratio = sd(1) / sd(2)                                         f =   1.3367
Ho: ratio = 1                                    degrees of freedom =   64, 20

    Ha: ratio < 1               Ha: ratio != 1                 Ha: ratio > 1
  Pr(F < f) = 0.7616         2*Pr(F > f) = 0.4768           Pr(F > f) = 0.2384

. 
. oneway time2 gnlr

                        Analysis of Variance
    Source              SS         df      MS            F     Prob > F
------------------------------------------------------------------------
Between groups      614.051419      1   614.051419      1.69     0.1972
 Within groups      30523.4225     84   363.374078
------------------------------------------------------------------------
    Total            31137.474     85   366.323223

Bartlett's test for equal variances:  chi2(1) =   0.5982  Prob>chi2 = 0.439

. 
. tabstat time2, stat (mean) by (glym)

Summary for variables: time2
     by categories of: glym 

    glym |      mean
---------+----------
       1 |  14.27188
       2 |      18.5
---------+----------
   Total |  15.35349
--------------------

. 
. sdtest time2, by (glym)

Variance ratio test
------------------------------------------------------------------------------
   Group |     Obs        Mean    Std. Err.   Std. Dev.   [95% Conf. Interval]
---------+--------------------------------------------------------------------
       1 |      64    14.27188    2.559612     20.4769    9.156898    19.38685
       2 |      22        18.5    3.096108    14.52204    12.06129    24.93871
---------+--------------------------------------------------------------------
combined |      86    15.35349    2.063873    19.13957    11.24996    19.45702
------------------------------------------------------------------------------
    ratio = sd(1) / sd(2)                                         f =   1.9883
Ho: ratio = 1                                    degrees of freedom =   63, 21

    Ha: ratio < 1               Ha: ratio != 1                 Ha: ratio > 1
  Pr(F < f) = 0.9592         2*Pr(F > f) = 0.0816           Pr(F > f) = 0.0408

. 
. oneway time2 glym

                        Analysis of Variance
    Source              SS         df      MS            F     Prob > F
------------------------------------------------------------------------
Between groups      292.684578      1   292.684578      0.80     0.3745
 Within groups      30844.7894     84   367.199874
------------------------------------------------------------------------
    Total            31137.474     85   366.323223

Bartlett's test for equal variances:  chi2(1) =   3.2311  Prob>chi2 = 0.072

. 
. tabstat time2, stat (mean) by (gneu)

Summary for variables: time2
     by categories of: gneu 

    gneu |      mean
---------+----------
       1 |  15.95156
       2 |  13.61364
---------+----------
   Total |  15.35349
--------------------

. 
. sdtest time2, by (gneu)

Variance ratio test
------------------------------------------------------------------------------
   Group |     Obs        Mean    Std. Err.   Std. Dev.   [95% Conf. Interval]
---------+--------------------------------------------------------------------
       1 |      64    15.95156     2.45262    19.62096    11.05039    20.85273
       2 |      22    13.61364    3.834822    17.98691    5.638688    21.58858
---------+--------------------------------------------------------------------
combined |      86    15.35349    2.063873    19.13957    11.24996    19.45702
------------------------------------------------------------------------------
    ratio = sd(1) / sd(2)                                         f =   1.1899
Ho: ratio = 1                                    degrees of freedom =   63, 21

    Ha: ratio < 1               Ha: ratio != 1                 Ha: ratio > 1
  Pr(F < f) = 0.6620         2*Pr(F > f) = 0.6760           Pr(F > f) = 0.3380

. 
. oneway time2 gneu

                        Analysis of Variance
    Source              SS         df      MS            F     Prob > F
------------------------------------------------------------------------
Between groups      89.4882006      1   89.4882006      0.24     0.6240
 Within groups      31047.9858     84   369.618878
------------------------------------------------------------------------
    Total            31137.474     85   366.323223

Bartlett's test for equal variances:  chi2(1) =   0.2273  Prob>chi2 = 0.634

. 
. tabstat time2, stat (mean) by (gaptt)

Summary for variables: time2
     by categories of: gaptt 

   gaptt |      mean
---------+----------
       1 |  15.24687
       2 |  15.66364
---------+----------
   Total |  15.35349
--------------------

. 
. sdtest time2, by (gaptt)

Variance ratio test
------------------------------------------------------------------------------
   Group |     Obs        Mean    Std. Err.   Std. Dev.   [95% Conf. Interval]
---------+--------------------------------------------------------------------
       1 |      64    15.24687    2.299584    18.39667    10.65152    19.84223
       2 |      22    15.66364    4.608732    21.61687    6.079253    25.24802
---------+--------------------------------------------------------------------
combined |      86    15.35349    2.063873    19.13957    11.24996    19.45702
------------------------------------------------------------------------------
    ratio = sd(1) / sd(2)                                         f =   0.7243
Ho: ratio = 1                                    degrees of freedom =   63, 21

    Ha: ratio < 1               Ha: ratio != 1                 Ha: ratio > 1
  Pr(F < f) = 0.1631         2*Pr(F < f) = 0.3261           Pr(F > f) = 0.8369

. 
. oneway time2 gaptt

                        Analysis of Variance
    Source              SS         df      MS            F     Prob > F
------------------------------------------------------------------------
Between groups       2.8436694      1    2.8436694      0.01     0.9304
 Within groups      31134.6303     84   370.650361
------------------------------------------------------------------------
    Total            31137.474     85   366.323223

Bartlett's test for equal variances:  chi2(1) =   0.8479  Prob>chi2 = 0.357

. 
. tabstat time2, stat (mean) by (gpt)

Summary for variables: time2
     by categories of: gpt 

     gpt |      mean
---------+----------
       1 |  17.77969
       2 |  8.295455
---------+----------
   Total |  15.35349
--------------------

. 
. sdtest time2, by (gpt)

Variance ratio test
------------------------------------------------------------------------------
   Group |     Obs        Mean    Std. Err.   Std. Dev.   [95% Conf. Interval]
---------+--------------------------------------------------------------------
       1 |      64    17.77969      2.6427     21.1416    12.49867     23.0607
       2 |      22    8.295455    1.805385    8.468006    4.540951    12.04996
---------+--------------------------------------------------------------------
combined |      86    15.35349    2.063873    19.13957    11.24996    19.45702
------------------------------------------------------------------------------
    ratio = sd(1) / sd(2)                                         f =   6.2332
Ho: ratio = 1                                    degrees of freedom =   63, 21

    Ha: ratio < 1               Ha: ratio != 1                 Ha: ratio > 1
  Pr(F < f) = 1.0000         2*Pr(F > f) = 0.0000           Pr(F > f) = 0.0000

. 
. oneway time2 gpt

                        Analysis of Variance
    Source              SS         df      MS            F     Prob > F
------------------------------------------------------------------------
Between groups      1472.68081      1   1472.68081      4.17     0.0443
 Within groups      29664.7931     84   353.152299
------------------------------------------------------------------------
    Total            31137.474     85   366.323223

Bartlett's test for equal variances:  chi2(1) =  18.3235  Prob>chi2 = 0.000

. 
. tabstat time2, stat (mean) by (gtt)

Summary for variables: time2
     by categories of: gtt 

     gtt |      mean
---------+----------
       1 |  14.80656
       2 |    16.688
---------+----------
   Total |  15.35349
--------------------

. 
. sdtest time2, by (gtt)

Variance ratio test
------------------------------------------------------------------------------
   Group |     Obs        Mean    Std. Err.   Std. Dev.   [95% Conf. Interval]
---------+--------------------------------------------------------------------
       1 |      61    14.80656    2.458744     19.2034    9.888338    19.72478
       2 |      25      16.688    3.861879     19.3094    8.717473    24.65853
---------+--------------------------------------------------------------------
combined |      86    15.35349    2.063873    19.13957    11.24996    19.45702
------------------------------------------------------------------------------
    ratio = sd(1) / sd(2)                                         f =   0.9891
Ho: ratio = 1                                    degrees of freedom =   60, 24

    Ha: ratio < 1               Ha: ratio != 1                 Ha: ratio > 1
  Pr(F < f) = 0.4677         2*Pr(F < f) = 0.9354           Pr(F > f) = 0.5323

. 
. oneway time2 gtt

                        Analysis of Variance
    Source              SS         df      MS            F     Prob > F
------------------------------------------------------------------------
Between groups      62.7701764      1   62.7701764      0.17     0.6814
 Within groups      31074.7038     84    369.93695
------------------------------------------------------------------------
    Total            31137.474     85   366.323223

Bartlett's test for equal variances:  chi2(1) =   0.0010  Prob>chi2 = 0.974

. 
. tabstat time2, stat (mean) by (gfib)

Summary for variables: time2
     by categories of: gfib 

    gfib |      mean
---------+----------
       1 |      16.5
       2 |  11.80476
---------+----------
   Total |  15.35349
--------------------

. 
. sdtest time2, by (gfib)

Variance ratio test
------------------------------------------------------------------------------
   Group |     Obs        Mean    Std. Err.   Std. Dev.   [95% Conf. Interval]
---------+--------------------------------------------------------------------
       1 |      65        16.5    2.648339    21.35159    11.20934    21.79066
       2 |      21    11.80476    1.958248    8.973822    7.719927     15.8896
---------+--------------------------------------------------------------------
combined |      86    15.35349    2.063873    19.13957    11.24996    19.45702
------------------------------------------------------------------------------
    ratio = sd(1) / sd(2)                                         f =   5.6612
Ho: ratio = 1                                    degrees of freedom =   64, 20

    Ha: ratio < 1               Ha: ratio != 1                 Ha: ratio > 1
  Pr(F < f) = 1.0000         2*Pr(F > f) = 0.0001           Pr(F > f) = 0.0000

. 
. oneway time2 gfib

                        Analysis of Variance
    Source              SS         df      MS            F     Prob > F
------------------------------------------------------------------------
Between groups       349.90443      1    349.90443      0.95     0.3313
 Within groups      30787.5695     84   366.518685
------------------------------------------------------------------------
    Total            31137.474     85   366.323223

Bartlett's test for equal variances:  chi2(1) =  16.0560  Prob>chi2 = 0.000

. 
. tabstat time2, stat (mean) by (gdd)

Summary for variables: time2
     by categories of: gdd 

     gdd |      mean
---------+----------
       1 |  16.67903
       2 |  11.92917
---------+----------
   Total |  15.35349
--------------------

. 
. sdtest time2, by (gdd)

Variance ratio test
------------------------------------------------------------------------------
   Group |     Obs        Mean    Std. Err.   Std. Dev.   [95% Conf. Interval]
---------+--------------------------------------------------------------------
       1 |      62    16.67903    2.372495    18.68104    11.93494    21.42313
       2 |      24    11.92917    4.139604    20.27984    3.365743    20.49259
---------+--------------------------------------------------------------------
combined |      86    15.35349    2.063873    19.13957    11.24996    19.45702
------------------------------------------------------------------------------
    ratio = sd(1) / sd(2)                                         f =   0.8485
Ho: ratio = 1                                    degrees of freedom =   61, 23

    Ha: ratio < 1               Ha: ratio != 1                 Ha: ratio > 1
  Pr(F < f) = 0.2982         2*Pr(F < f) = 0.5964           Pr(F > f) = 0.7018

. 
. oneway time2 gdd

                        Analysis of Variance
    Source              SS         df      MS            F     Prob > F
------------------------------------------------------------------------
Between groups      390.361628      1   390.361628      1.07     0.3047
 Within groups      30747.1123     84   366.037051
------------------------------------------------------------------------
    Total            31137.474     85   366.323223

Bartlett's test for equal variances:  chi2(1) =   0.2271  Prob>chi2 = 0.634

. ranksum time2, by (gcea)

Two-sample Wilcoxon rank-sum (Mann-Whitney) test

        gcea |      obs    rank sum    expected
-------------+---------------------------------
           1 |       57        2519      2479.5
           2 |       29        1222      1261.5
-------------+---------------------------------
    combined |       86        3741        3741

unadjusted variance    11984.25
adjustment for ties      -15.04
                     ----------
adjusted variance      11969.21

Ho: time2(gcea==1) = time2(gcea==2)
             z =   0.361
    Prob > |z| =   0.7181

. ranksum time2, by (galb)

Two-sample Wilcoxon rank-sum (Mann-Whitney) test

        galb |      obs    rank sum    expected
-------------+---------------------------------
           1 |       38        1420        1653
           2 |       48        2321        2088
-------------+---------------------------------
    combined |       86        3741        3741

unadjusted variance    13224.00
adjustment for ties      -16.59
                     ----------
adjusted variance      13207.41

Ho: time2(galb==1) = time2(galb==2)
             z =  -2.027
    Prob > |z| =   0.0426

. 
. ranksum time2, by (gcrp)

Two-sample Wilcoxon rank-sum (Mann-Whitney) test

        gcrp |      obs    rank sum    expected
-------------+---------------------------------
           1 |       25      1325.5      1087.5
           2 |       61      2415.5      2653.5
-------------+---------------------------------
    combined |       86        3741        3741

unadjusted variance    11056.25
adjustment for ties      -13.87
                     ----------
adjusted variance      11042.38

Ho: time2(gcrp==1) = time2(gcrp==2)
             z =   2.265
    Prob > |z| =   0.0235

. 
. ranksum time2, by (GPS)

Two-sample Wilcoxon rank-sum (Mann-Whitney) test

         GPS |      obs    rank sum    expected
-------------+---------------------------------
           0 |       19      1043.5       826.5
           1 |       67      2697.5      2914.5
-------------+---------------------------------
    combined |       86        3741        3741

unadjusted variance     9229.25
adjustment for ties      -11.58
                     ----------
adjusted variance       9217.67

Ho: time2(GPS==0) = time2(GPS==1)
             z =   2.260
    Prob > |z| =   0.0238

. 
. ranksum time2, by (gplr)

Two-sample Wilcoxon rank-sum (Mann-Whitney) test

        gplr |      obs    rank sum    expected
-------------+---------------------------------
           1 |       66      2904.5        2871
           2 |       20       836.5         870
-------------+---------------------------------
    combined |       86        3741        3741

unadjusted variance     9570.00
adjustment for ties      -12.01
                     ----------
adjusted variance       9557.99

Ho: time2(gplr==1) = time2(gplr==2)
             z =   0.343
    Prob > |z| =   0.7319

. log close
      name:  <unnamed>
       log:  C:\Users\whs\Desktop\PT�޻�\0423.log
  log type:  text
 closed on:  24 Apr 2019, 20:02:49
---------------------------------------------------------------------------------------------------------------------------------------------
